# Supplementary material for: An analytical method for quantifying petroleum hydrocarbon fractions in soils, and its associated uncertainties
Source: Royal Society of Chemistry journal article supplement (doi:10.1039/c4ay00097h), 2014-01-01
Supplement: c4ay00097h1.pdf [file c4ay00097h1.pdf]

ELECTRONIC SUPPLEMENTARY INFORMATION

## Petroleum hydrocarbons fractions in soils: development of analytical method and uncertainty associated.

Cite this: DOI: 10.1039/x0xx00000x

Oscar Pindado Jiménez, Rosa M. Pérez Pastor and Olga Escolano Segovia

Received 00th January 2012,  
Accepted 00th January 2012

This Electronic Supplementary Information summarises the uncertainty assessment of each hydrocarbon fraction and all the comments that could not be included into the text. This document is divided in 6 sections, including 13 figures and 24 tables.

DOI: 10.1039/x0xx00000x

[www.rsc.org/](http://www.rsc.org/)

### Section 1: Definition of ranges of hydrocarbons and calibrate.

Table I: Equivalent number of carbons.

Table II: Definition of the ranges of aliphatic and aromatic hydrocarbons.

Table III: Total concentration injected in each calibration solution.

Figure I: Graphical representation of the instrumental response versus concentration of the calibration standards.

### Section 2: Uncertainty of area.

Table IV: Uncertainty of chromatography area.

### Section 3: Uncertainty of volume.

Table V: Uncertainty of volume: influence of temperature.

Table VI: Uncertainty of volume: influence of tolerance of volumetric material (syringe 1 mL).

Table VII: Uncertainty of volume: influence of repeatability (1 mL hexane).

Table VIII: Repeatability of a weighing of 1 mL hexane.

### Section 4: Uncertainty of mass.

Table IX: Uncertainty of mass.

Table X: Repeatability of a weighing of 1 g of soil.

## ELECTRONIC SUPPLEMENTARY INFORMATION

**Section 5: Uncertainty of calibration factor.**

Figure II: Equations to calculate uncertainty of  $\delta$ .

Table XI: Uncertainty of  $\delta$ : Influence of area.

Table XII: Intermediate precision of area of the CRM-372.

Table XIII: Uncertainty of  $\delta$ : Influence of stock solution.

Table XIV: Uncertainty of  $\delta$ : Influence of volume (contribution of temperature).

Table XV: Uncertainty of  $\delta$ : Influence of volume (contribution of tolerance of syringe).

Table XVI: Uncertainty of  $\delta$ : Influence of volume (contribution of repeatability).

Table XVII: Repeatability of a weighing of 0.1 mL hexane.

Table XVIII: Repeatability of a weighing of 0.05 mL hexane.

Table XIX: Uncertainty of  $\delta$ : Influence of volume (syringe 0.1 mL and 0.05 mL).

Table XX: Uncertainties of  $\delta$ : Components of uncertainty for each calibrate solution.

Table XXI: Uncertainty of  $\delta$ : Influence of standards of calibrate.

Table XXII: Uncertainty of  $\delta$ .

**Section 6: Uncertainty of recovery.**

Table XXIII: Uncertainty of recovery.

**Section 7: Uncertainty of inhomogeneity.**

Table XXIV: Uncertainty of inhomogeneity.

**Section 8: Combined uncertainty: Kragten method.**

Figure III: Uncertainty combined of TPH.

Figure IV: Uncertainty combined of  $>C_{10} - C_{12}$  (Aliphatic).

Figure V: Uncertainty combined of  $>C_{12} - C_{16}$  (Aliphatic).

Figure VI: Uncertainty combined of  $>C_{16} - C_{21}$  (Aliphatic).

Figure VII: Uncertainty combined of  $>C_{21} - C_{35}$  (Aliphatic).

Figure VIII: Uncertainty combined of  $>C_{35}$  (Aliphatic).

Figure IX: Uncertainty combined of  $>C_{10} - C_{12}$  (Aromatic).

Figure X: Uncertainty combined of  $>C_{12} - C_{16}$  (Aromatic).

Figure XI: Uncertainty combined of  $>C_{16} - C_{21}$  (Aromatic).

Figure XII: Uncertainty combined of  $>C_{21} - C_{35}$  (Aromatic).

Figure XIII: Uncertainty combined of  $>C_{35}$  (Aromatic).

Table I: Equivalent number of carbon atoms

| Compound    | Carbons | EC | Compounds        | Carbons | EC | Compounds             | Carbons | EC    |
|-------------|---------|----|------------------|---------|----|-----------------------|---------|-------|
| Nonane      | 9       | 9  | Pentacosano      | 25      | 25 | Naphthalene           | 10      | 11.69 |
| Decane      | 10      | 10 | Hexacosano       | 26      | 26 | Acenaphthylene        | 12      | 15.06 |
| Undecane    | 11      | 11 | Heptacosano      | 27      | 27 | Acenaphthene          | 12      | 15.50 |
| Dodecane    | 12      | 12 | Octacosano       | 28      | 28 | Fluorene              | 13      | 16.55 |
| Tridecane   | 13      | 13 | Nonacosano       | 29      | 29 | Phenanthrene          | 14      | 19.36 |
| Tetradecane | 14      | 14 | Triacontane      | 30      | 30 | Anthracene            | 14      | 19.43 |
| Pentadecane | 15      | 15 | Hentriacontane   | 31      | 31 | Fluoranthene          | 16      | 21.85 |
| Hexadecane  | 16      | 16 | Dotriacontane    | 32      | 32 | Pyrene                | 16      | 20.80 |
| Heptadecane | 17      | 17 | Tritriacontane   | 33      | 33 | Benzo(a)anthracene    | 18      | 26.37 |
| Octadecane  | 18      | 18 | Tetratriacontane | 34      | 34 | Chrysene              | 18      | 27.41 |
| Nonadecane  | 19      | 19 | Pentatriacontane | 35      | 35 | Benzo(b)fluoranthene  | 20      | 30.14 |
| Eicosano    | 20      | 20 | Hexatriacontane  | 36      | 36 | Benzo(k)fluoranthene  | 20      | 30.14 |
| Heneicosano | 21      | 21 | Heptatriacontane | 37      | 37 | Benzo(a)pyrene        | 20      | 31.34 |
| Docosano    | 22      | 22 | Octatriacontane  | 38      | 38 | Indeno(123cd)pyrene   | 22      | 35.01 |
| Tricosano   | 23      | 23 | Nonatriacontane  | 39      | 39 | Dibenzo(ah)anthracene | 22      | 33.92 |
| Tetracosano | 24      | 24 | Tetracontane     | 40      | 40 | Benzo(ghi)perylene    | 22      | 34.01 |

Table II: Definition of the ranges of aliphatic and aromatic hydrocarbons

| Ranges of Aliphatic hydrocarbons   | Ranges of Aromatic hydrocarbons      |
|------------------------------------|--------------------------------------|
| >C <sub>10</sub> - C <sub>12</sub> | >EC <sub>10</sub> - EC <sub>12</sub> |
| >C <sub>12</sub> - C <sub>16</sub> | >EC <sub>12</sub> - EC <sub>16</sub> |
| >C <sub>16</sub> - C <sub>21</sub> | >EC <sub>16</sub> - EC <sub>21</sub> |
| >C <sub>21</sub> - C <sub>35</sub> | >EC <sub>21</sub> - EC <sub>35</sub> |
| >C <sub>35</sub>                   | >EC <sub>35</sub>                    |

>C<sub>10</sub>- C<sub>12</sub> is defined as all aliphatic hydrocarbons compounds which contain between 11 and 12 carbon atoms. This range begins 0.1 minutes after the retention time of decane and finishes 0.1 minutes before the retention time of tridecane

>C<sub>12</sub>- C<sub>16</sub> is defined as all aliphatic hydrocarbons compounds which contain between 13 and 16 carbon atoms. This range begins 0.1 minutes before the retention time of tridecane and finishes 0.1 minutes before the retention time of heptadecane.

>C<sub>16</sub>- C<sub>21</sub> is defined as all aliphatic hydrocarbons compounds which contain between 17 and 21 carbon atoms. This range begins 0.1 minutes before the retention time of heptadecane and finishes 0.1 minutes before the retention time of docosane.

>C<sub>21</sub>- C<sub>35</sub> is defined as all aliphatic hydrocarbons compounds which contain between 22 and 35 carbon atoms. This range begins 0.1 minutes before the retention time of docosane and finishes 0.1 minutes before the retention time of hexatricosane.

>C<sub>35</sub> is defined as all aliphatic hydrocarbons compounds which contain more than 36 carbon atoms. This range begins 0.1 minutes before the retention time of hexatricosane and finishes 0.1 minutes after the retention time of tetracontane.

>EC<sub>10</sub>- EC<sub>12</sub> is defined as all aromatic hydrocarbons compounds which contain between 11 and 12 equivalent number of carbon atoms. This range begins 0.1 minutes before the retention time of naphthalene and finishes 0.1 minutes before the retention time of acenaphthylene.

>EC<sub>12</sub>- EC<sub>16</sub> is defined as all aromatic hydrocarbons compounds which contain between 13 and 16 equivalent number of carbon atoms. This range begins 0.1 minutes before the retention time of acenaphthylene and finishes 0.1 minutes before the retention time of fluorene.

>EC<sub>16</sub>- EC<sub>21</sub> is defined as all aromatic hydrocarbons compounds which contain between 17 and 21 equivalent number of carbon atoms. This range begins 0.1 minutes before the retention time of fluorene and finishes 0.1 minutes before the retention time of benzo(a)anthracene.

>EC<sub>21</sub>- EC<sub>35</sub> is defined as all aromatic hydrocarbons compounds which contain between 22 and 35 equivalent number of carbon atoms. This range begins 0.1 minutes before the retention time of benzo(a)anthracene and finishes 0.1 minutes before the retention time of indeno(123-cd)pyrene.

>EC<sub>35</sub> is defined as all aromatic hydrocarbons compounds which contain more than 36 equivalent number of carbon atoms. This range begins 0.1 minutes before the retention time of indeno(123-cd)pyrene and finishes 0.1 minutes after the retention time of benzo(ghi)perylene.

Table III: Total concentration injected in each calibration solution.

|                                      | Solution 1            | Solution 2            | Solution 3            | Solution 4            | Solution 5            | Solution 6            |
|--------------------------------------|-----------------------|-----------------------|-----------------------|-----------------------|-----------------------|-----------------------|
|                                      | (mg L <sup>-1</sup> ) |
| TPH                                  | 80                    | 200                   | 400                   | 800                   | 1200                  | 1600                  |
| Aliphatic                            |                       |                       |                       |                       |                       |                       |
| >C <sub>10</sub> - C <sub>12</sub>   | 20                    | 50                    | 100                   | 200                   | 300                   | 400                   |
| >C <sub>12</sub> - C <sub>16</sub>   | 40                    | 100                   | 200                   | 400                   | 600                   | 800                   |
| >C <sub>16</sub> - C <sub>21</sub>   | 70                    | 175                   | 350                   | 700                   | 1050                  | 1400                  |
| >C <sub>21</sub> - C <sub>35</sub>   | 140                   | 350                   | 700                   | 1400                  | 2100                  | 2800                  |
| >C <sub>35</sub>                     | 50                    | 125                   | 250                   | 500                   | 750                   | 1000                  |
| Aromatic                             |                       |                       |                       |                       |                       |                       |
| >EC <sub>10</sub> - EC <sub>12</sub> | 10                    | 20                    | 40                    | 60                    | 80                    | 100                   |
| >EC <sub>12</sub> - EC <sub>16</sub> | 10                    | 20                    | 40                    | 60                    | 80                    | 100                   |
| >EC <sub>16</sub> - EC <sub>21</sub> | 40                    | 80                    | 160                   | 240                   | 320                   | 400                   |
| >EC <sub>21</sub> - EC <sub>35</sub> | 50                    | 100                   | 200                   | 300                   | 400                   | 500                   |
| >EC <sub>35</sub>                    | 30                    | 60                    | 120                   | 180                   | 240                   | 300                   |

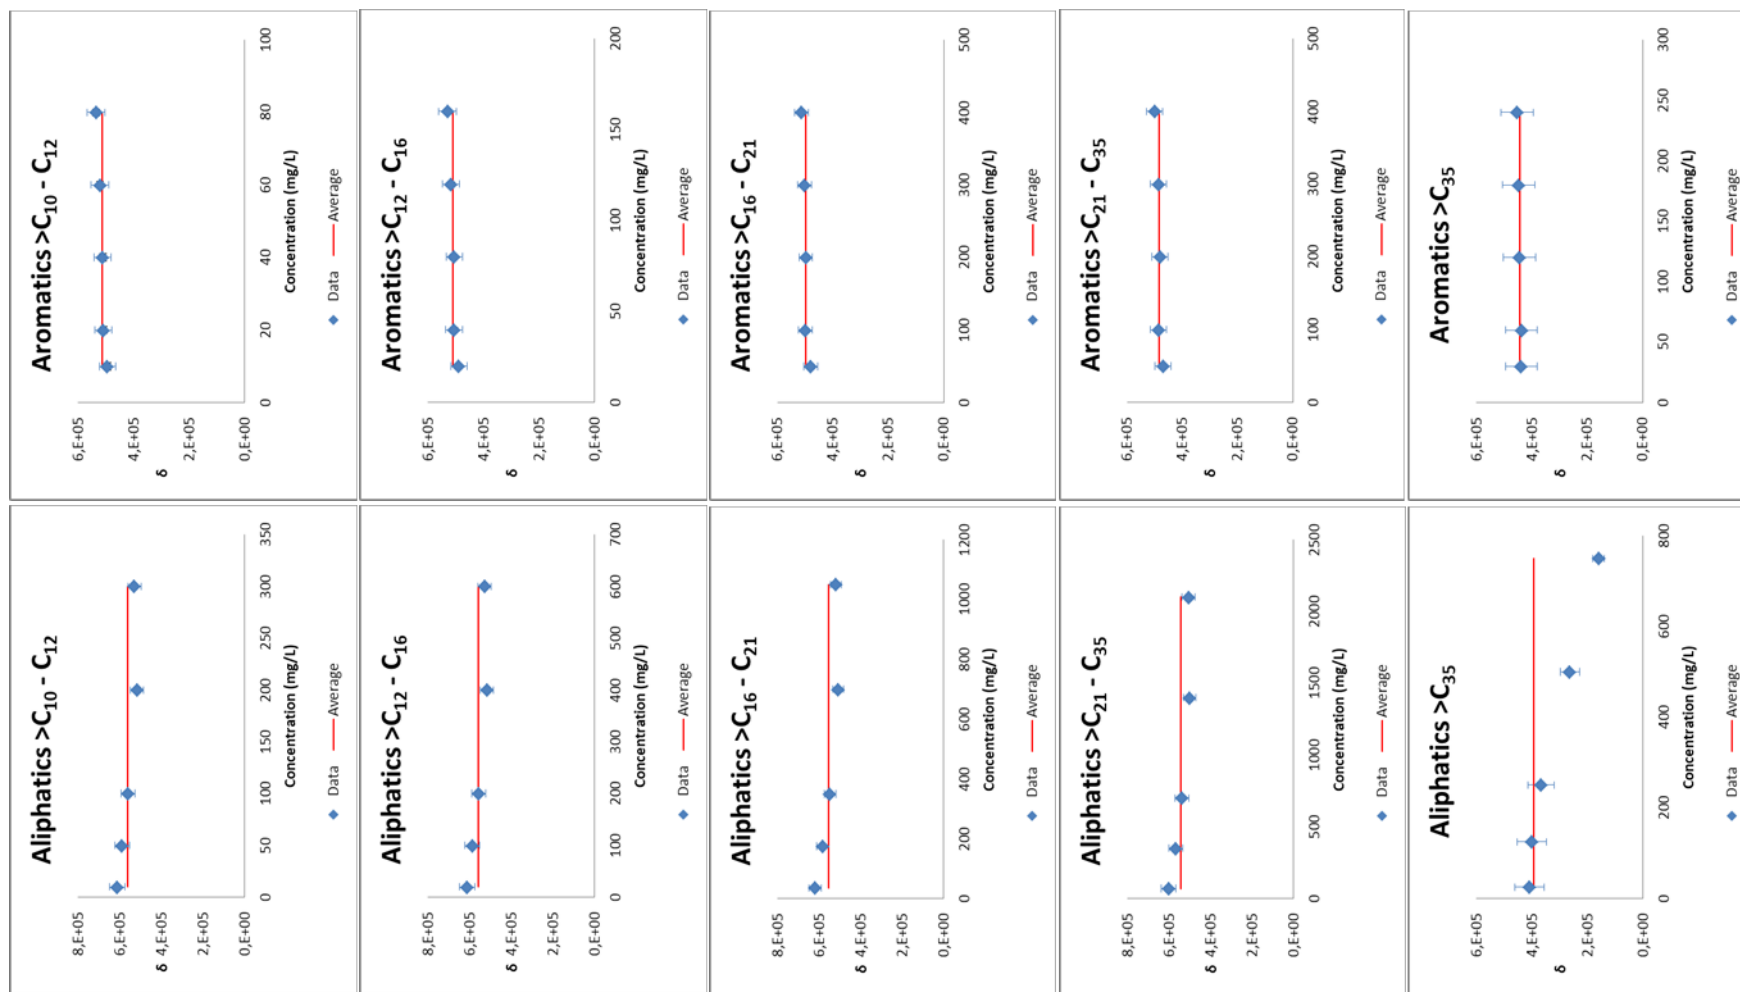

Figure 1: Graphical representation of the instrumental response versus concentration of the calibration standards.

Table IV: Uncertainty of chromatography area.

|                                      | Resolution<br>(pA s) | u(resolution) | A<br>x 10 <sup>6</sup> (pA s) | u(resolution) <sub>r</sub><br>x 10 <sup>-8</sup> |
|--------------------------------------|----------------------|---------------|-------------------------------|--------------------------------------------------|
| TPH                                  | 1                    | 0.577         | 78.7                          | 0.7335                                           |
| Aliphatic                            |                      |               |                               |                                                  |
| >C <sub>10</sub> - C <sub>12</sub>   | 1                    | 0.577         | 5.7                           | 10.04                                            |
| >C <sub>12</sub> - C <sub>16</sub>   | 1                    | 0.577         | 10.5                          | 5.497                                            |
| >C <sub>16</sub> - C <sub>21</sub>   | 1                    | 0.577         | 16.3                          | 3.538                                            |
| >C <sub>21</sub> - C <sub>35</sub>   | 1                    | 0.577         | 31.2                          | 1.850                                            |
| >C <sub>35</sub>                     | 1                    | 0.577         | 14.9                          | 3.867                                            |
| Aromatic                             |                      |               |                               |                                                  |
| >EC <sub>10</sub> - EC <sub>12</sub> | 1                    | 0.577         | 11.5                          | 5.004                                            |
| >EC <sub>12</sub> - EC <sub>16</sub> | 1                    | 0.577         | 21.8                          | 2.649                                            |
| >EC <sub>16</sub> - EC <sub>21</sub> | 1                    | 0.577         | 52.3                          | 1.103                                            |
| >EC <sub>21</sub> - EC <sub>35</sub> | 1                    | 0.577         | 51.6                          | 1.118                                            |
| >EC <sub>35</sub>                    | 1                    | 0.577         | 29.6                          | 1.953                                            |

$$u(\text{resolution})_r = \left( \frac{a/\sqrt{3}}{A} \right)$$

Table V: Uncertainty of volume: influence of temperature.

|                                      | Influence of temperature |                    |                                 |                |          |                                    |
|--------------------------------------|--------------------------|--------------------|---------------------------------|----------------|----------|------------------------------------|
|                                      | Volume<br>(mL)           | $\Delta T$<br>(°K) | $\alpha$<br>(°K <sup>-1</sup> ) | $u(T)$<br>(mL) | $u(T)_r$ | $(u(T)_r)^2$<br>x 10 <sup>-5</sup> |
| TPH                                  | 1                        | 5                  | 0.00135                         | 0.00675        | 0.00390  | 1.519                              |
| Aliphatic                            |                          |                    |                                 |                |          |                                    |
| >C <sub>10</sub> - C <sub>12</sub>   | 1                        | 5                  | 0.00135                         | 0.00675        | 0.00390  | 1.519                              |
| >C <sub>12</sub> - C <sub>16</sub>   | 1                        | 5                  | 0.00135                         | 0.00675        | 0.00390  | 1.519                              |
| >C <sub>16</sub> - C <sub>21</sub>   | 1                        | 5                  | 0.00135                         | 0.00675        | 0.00390  | 1.519                              |
| >C <sub>21</sub> - C <sub>35</sub>   | 1                        | 5                  | 0.00135                         | 0.00675        | 0.00390  | 1.519                              |
| >C <sub>35</sub>                     | 1                        | 5                  | 0.00135                         | 0.00675        | 0.00390  | 1.519                              |
| Aromatic                             |                          |                    |                                 |                |          |                                    |
| >EC <sub>10</sub> - EC <sub>12</sub> | 1                        | 5                  | 0.00135                         | 0.00675        | 0.00390  | 1.519                              |
| >EC <sub>12</sub> - EC <sub>16</sub> | 1                        | 5                  | 0.00135                         | 0.00675        | 0.00390  | 1.519                              |
| >EC <sub>16</sub> - EC <sub>21</sub> | 1                        | 5                  | 0.00135                         | 0.00675        | 0.00390  | 1.519                              |
| >EC <sub>21</sub> - EC <sub>35</sub> | 1                        | 5                  | 0.00135                         | 0.00675        | 0.00390  | 1.519                              |
| >EC <sub>35</sub>                    | 1                        | 5                  | 0.00135                         | 0.00675        | 0.00390  | 1.519                              |

$$u(T)_r = \left( \frac{V \times \Delta T \times \alpha}{\sqrt{3}} \right)$$



Table VI: Uncertainty of volume: influence of tolerance of volumetric material (syringe 1 mL)

|                                      | Influence of tolerance of syringe |                  |                |                     |                                                           |
|--------------------------------------|-----------------------------------|------------------|----------------|---------------------|-----------------------------------------------------------|
|                                      | Volume<br>(mL)                    | Division<br>(mL) | u(Tol)<br>(mL) | u(Tol) <sub>r</sub> | (u(Tol) <sub>r</sub> ) <sup>2</sup><br>x 10 <sup>-5</sup> |
| TPH                                  | 1                                 | 0.01             | 0.00408        | 0.00408             | 1.667                                                     |
| Aliphatic                            |                                   |                  |                |                     |                                                           |
| >C <sub>10</sub> - C <sub>12</sub>   | 1                                 | 0.01             | 0.00408        | 0.00408             | 1.667                                                     |
| >C <sub>12</sub> - C <sub>16</sub>   | 1                                 | 0.01             | 0.00408        | 0.00408             | 1.667                                                     |
| >C <sub>16</sub> - C <sub>21</sub>   | 1                                 | 0.01             | 0.00408        | 0.00408             | 1.667                                                     |
| >C <sub>21</sub> - C <sub>35</sub>   | 1                                 | 0.01             | 0.00408        | 0.00408             | 1.667                                                     |
| >C <sub>35</sub>                     | 1                                 | 0.01             | 0.00408        | 0.00408             | 1.667                                                     |
| Aromatic                             |                                   |                  |                |                     |                                                           |
| >EC <sub>10</sub> - EC <sub>12</sub> | 1                                 | 0.01             | 0.00408        | 0.00408             | 1.667                                                     |
| >EC <sub>12</sub> - EC <sub>16</sub> | 1                                 | 0.01             | 0.00408        | 0.00408             | 1.667                                                     |
| >EC <sub>16</sub> - EC <sub>21</sub> | 1                                 | 0.01             | 0.00408        | 0.00408             | 1.667                                                     |
| >EC <sub>21</sub> - EC <sub>35</sub> | 1                                 | 0.01             | 0.00408        | 0.00408             | 1.667                                                     |
| >EC <sub>35</sub>                    | 1                                 | 0.01             | 0.00408        | 0.0408              | 1.667                                                     |

$$u(Tol)_r = \left( \frac{v/\sqrt{6}}{V} \right)$$

Table VII: Uncertainty of volume: influence of repeatability (1 mL hexane)

| Influence of repeatability           |         |         |            |                  |
|--------------------------------------|---------|---------|------------|------------------|
|                                      | mass    | s       | $u(rep)_r$ | $(u(rep)_r)^2$   |
|                                      | (g)     | (g)     |            | $\times 10^{-7}$ |
| TPH                                  | 0.65813 | 0.00023 | 0.000344   | 1.183            |
| Aliphatic                            |         |         |            |                  |
| >C <sub>10</sub> - C <sub>12</sub>   | 0.65813 | 0.00023 | 0.000344   | 1.183            |
| >C <sub>12</sub> - C <sub>16</sub>   | 0.65813 | 0.00023 | 0.000344   | 1.183            |
| >C <sub>16</sub> - C <sub>21</sub>   | 0.65813 | 0.00023 | 0.000344   | 1.183            |
| >C <sub>21</sub> - C <sub>35</sub>   | 0.65813 | 0.00023 | 0.000344   | 1.183            |
| >C <sub>35</sub>                     | 0.65813 | 0.00023 | 0.000344   | 1.183            |
| Aromatic                             |         |         |            |                  |
| >EC <sub>10</sub> - EC <sub>12</sub> | 0.65813 | 0.00023 | 0.000344   | 1.183            |
| >EC <sub>12</sub> - EC <sub>16</sub> | 0.65813 | 0.00023 | 0.000344   | 1.183            |
| >EC <sub>16</sub> - EC <sub>21</sub> | 0.65813 | 0.00023 | 0.000344   | 1.183            |
| >EC <sub>21</sub> - EC <sub>35</sub> | 0.65813 | 0.00023 | 0.000344   | 1.183            |
| >EC <sub>35</sub>                    | 0.65813 | 0.00023 | 0.000344   | 1.183            |

$$u(rep)_r = \left( \frac{s}{m} \right)$$

Table VIII: Repeatability of a weighing of 1 mL hexane

|                  | Weight (g) |         |         |         |         |         |         |         | Mean    | s       |
|------------------|------------|---------|---------|---------|---------|---------|---------|---------|---------|---------|
|                  | 1          | 2       | 3       | 4       | 5       | 6       | 7       | 8       |         |         |
| Syringe          | 26.467     | 26.467  | 26.467  | 26.467  | 26.467  | 26.467  | 26.467  | 26.467  |         |         |
| Syringe + hexane | 27.1249    | 27.1247 | 27.1248 | 27.1247 | 27.1247 | 27.1250 | 27.1246 | 27.1253 |         |         |
| Hexane           | 0.6582     | 0.6580  | 0.6581  | 0.6580  | 0.6580  | 0.6583  | 0.06579 | 0.06586 | 0.65813 | 0.00023 |

Table IX: Uncertainty of mass

|                                      | Influence of balance   |        |                        |                                  | Influence of repeatability |                        |                        |                     |                                    |
|--------------------------------------|------------------------|--------|------------------------|----------------------------------|----------------------------|------------------------|------------------------|---------------------|------------------------------------|
|                                      | u(m)                   | mass   | u(m) <sub>r</sub>      | (u(m)) <sub>r</sub> <sup>2</sup> | mass                       | s                      | u(rep)                 | u(rep) <sub>r</sub> | (u(rep)) <sub>r</sub> <sup>2</sup> |
|                                      | x 10 <sup>-5</sup> (g) | (g)    | x 10 <sup>-5</sup> (g) | X 10 <sup>-10</sup>              | (g)                        | x 10 <sup>-4</sup> (g) | x 10 <sup>-4</sup> (g) | x 10 <sup>-4</sup>  | x 10 <sup>-7</sup>                 |
| TPH                                  | 3.1                    | 1.0006 | 1.03                   | 1.06                             | 1.0006                     | 6.966                  | 4.021                  | 4.018               | 1.615                              |
| Aliphatic                            |                        |        |                        |                                  |                            |                        |                        |                     |                                    |
| >C <sub>10</sub> - C <sub>12</sub>   | 3.1                    | 1.0006 | 1.03                   | 1.06                             | 1.0006                     | 6.966                  | 4.021                  | 4.018               | 1.615                              |
| >C <sub>12</sub> - C <sub>16</sub>   | 3.1                    | 1.0006 | 1.03                   | 1.06                             | 1.0006                     | 6.966                  | 4.021                  | 4.018               | 1.615                              |
| >C <sub>16</sub> - C <sub>21</sub>   | 3.1                    | 1.0006 | 1.03                   | 1.06                             | 1.0006                     | 6.966                  | 4.021                  | 4.018               | 1.615                              |
| >C <sub>21</sub> - C <sub>35</sub>   | 3.1                    | 1.0006 | 1.03                   | 1.06                             | 1.0006                     | 6.966                  | 4.021                  | 4.018               | 1.615                              |
| >C <sub>35</sub>                     | 3.1                    | 1.0006 | 1.03                   | 1.06                             | 1.0006                     | 6.966                  | 4.021                  | 4.018               | 1.615                              |
| Aromatic                             |                        |        |                        |                                  |                            |                        |                        |                     |                                    |
| >EC <sub>10</sub> - EC <sub>12</sub> | 3.1                    | 1.0006 | 1.03                   | 1.06                             | 1.0006                     | 6.966                  | 4.021                  | 4.018               | 1.615                              |
| >EC <sub>12</sub> - EC <sub>16</sub> | 3.1                    | 1.0006 | 1.03                   | 1.06                             | 1.0006                     | 6.966                  | 4.021                  | 4.018               | 1.615                              |
| >EC <sub>16</sub> - EC <sub>21</sub> | 3.1                    | 1.0006 | 1.03                   | 1.06                             | 1.0006                     | 6.966                  | 4.021                  | 4.018               | 1.615                              |
| >EC <sub>21</sub> - EC <sub>35</sub> | 3.1                    | 1.0006 | 1.03                   | 1.06                             | 1.0006                     | 6.966                  | 4.021                  | 4.018               | 1.615                              |
| >EC <sub>35</sub>                    | 3.1                    | 1.0006 | 1.03                   | 1.06                             | 1.0006                     | 6.966                  | 4.021                  | 4.018               | 1.615                              |

$$u(m)_r = \left( \frac{u(m)}{m} \right) ; \quad u(rep)_r = \left( \frac{s/\sqrt{3}}{m} \right)$$

Table X: Repeatability of a weighing of 1 g of soil

|      | Weight (g) |         |         |         |         |        |         |        | Mean   | s        |
|------|------------|---------|---------|---------|---------|--------|---------|--------|--------|----------|
|      | 1          | 2       | 3       | 4       | 5       | 6      | 7       | 8      |        |          |
| Soil | 1.00163    | 1.00148 | 1.00097 | 1.00049 | 1.00036 | 1.0002 | 0.99998 | 0.9997 | 1.0006 | 0.000696 |

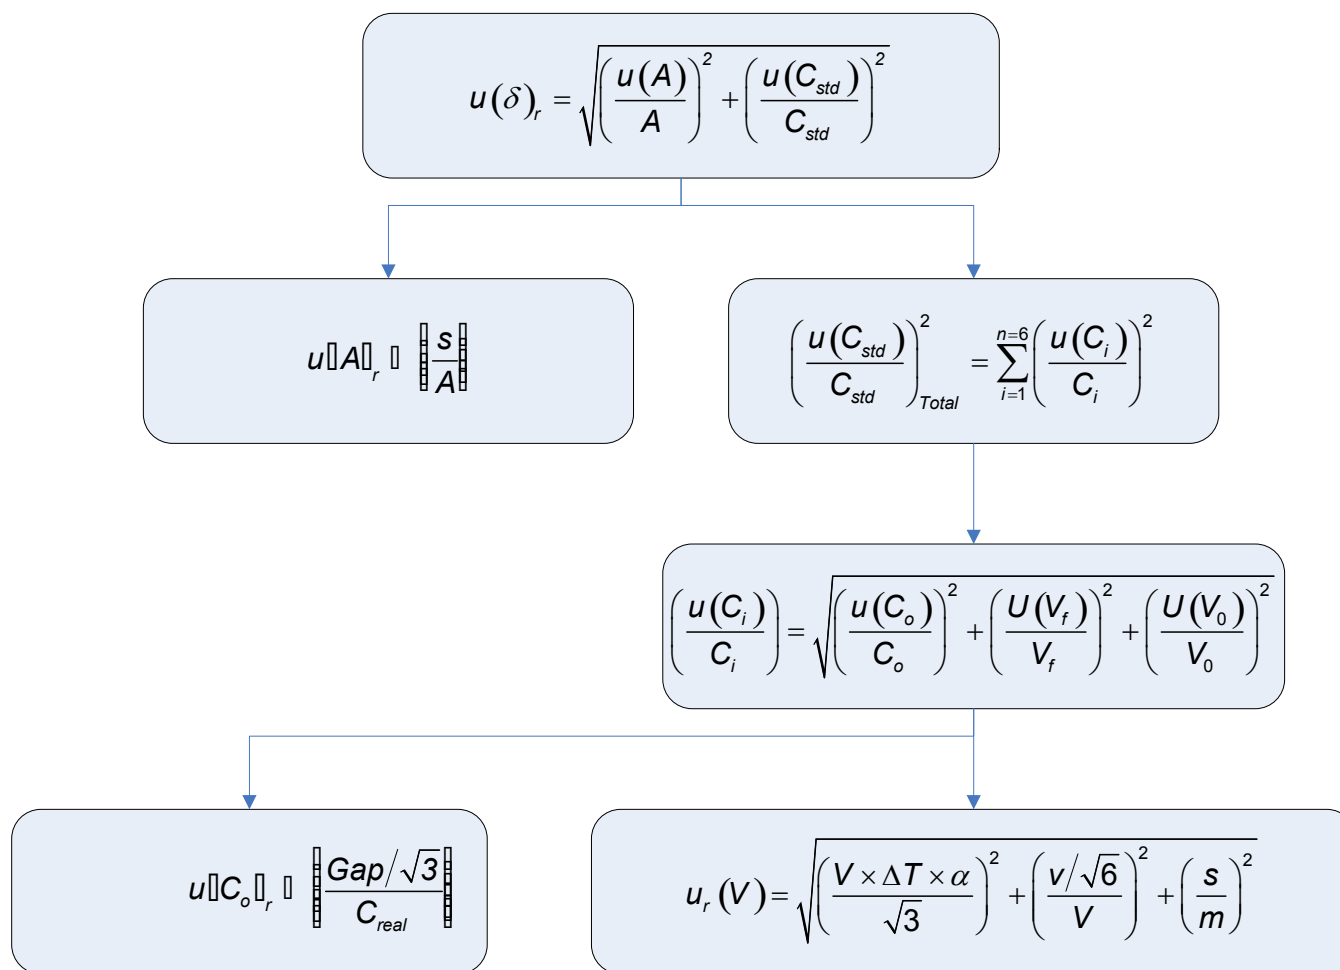

Figure II: Equations to calculate uncertainty of CF

Table XI: Uncertainty of  $\delta$ : Influence of area.

|                                      | Influence of area        |                          |                    |                                   |
|--------------------------------------|--------------------------|--------------------------|--------------------|-----------------------------------|
|                                      | A                        | s (n=8)                  | u(A) <sub>r</sub>  | (u(A) <sub>r</sub> ) <sup>2</sup> |
|                                      | x 10 <sup>6</sup> (pA s) | x 10 <sup>6</sup> (pA s) | x 10 <sup>-2</sup> | x 10 <sup>-4</sup>                |
| TPH                                  | 855                      | 15.2                     | 1.77               | 3.133                             |
| Aliphatic                            |                          |                          |                    |                                   |
| >C <sub>10</sub> - C <sub>12</sub>   | 45                       | 0.6                      | 1.25               | 1.562                             |
| >C <sub>12</sub> - C <sub>16</sub>   | 165                      | 2.2                      | 1.35               | 1.183                             |
| >C <sub>16</sub> - C <sub>21</sub>   | 104                      | 0.9                      | 0.83               | 0.0689                            |
| >C <sub>21</sub> - C <sub>35</sub>   | 324                      | 4.3                      | 1.34               | 1.796                             |
| >C <sub>35</sub>                     | 26                       | 0.7                      | 2.62               | 6.864                             |
| Aromatic                             |                          |                          |                    |                                   |
| >EC <sub>10</sub> - EC <sub>12</sub> | 17                       | 0.4                      | 2.54               | 6.452                             |
| >EC <sub>12</sub> - EC <sub>16</sub> | 62                       | 2.7                      | 4.43               | 19.62                             |
| >EC <sub>16</sub> - EC <sub>21</sub> | 56                       | 2.4                      | 4.28               | 18.32                             |
| >EC <sub>21</sub> - EC <sub>35</sub> | 29                       | 1.3                      | 4.46               | 19.89                             |
| >EC <sub>35</sub>                    | 27                       | 0.8                      | 2.80               | 7.840                             |

$$u(A)_r = \frac{\partial \delta}{\partial A}$$

Table XII: Intermediate precision of area of the CRM-372

| Intermediate precision: Area x 10 <sup>6</sup> (pA s) |      |      |      |      |      |      |      |      |      |      |
|-------------------------------------------------------|------|------|------|------|------|------|------|------|------|------|
|                                                       | 1    | 2    | 3    | 4    | 5    | 6    | 7    | 8    | Mean | s    |
| TPH                                                   | 837  | 846  | 841  | 839  | 866  | 871  | 865  | 873  | 855  | 15.2 |
| Aliphatic                                             |      |      |      |      |      |      |      |      |      |      |
| >C <sub>10</sub> - C <sub>12</sub>                    | 44.2 | 44.4 | 44.2 | 43.9 | 45.1 | 45.2 | 44.9 | 45.4 | 44.7 | 0.6  |
| >C <sub>12</sub> - C <sub>16</sub>                    | 162  | 163  | 163  | 162  | 166  | 167  | 166  | 167  | 165  | 2.2  |
| >C <sub>16</sub> - C <sub>21</sub>                    | 103  | 104  | 104  | 103  | 105  | 104  | 104  | 105  | 104  | 0.9  |
| >C <sub>21</sub> - C <sub>35</sub>                    | 318  | 321  | 322  | 320  | 328  | 329  | 326  | 330  | 324  | 4.3  |
| >C <sub>35</sub>                                      | 25.2 | 25.7 | 26.2 | 25.2 | 26.5 | 26.9 | 26.8 | 26.7 | 26   | 0.7  |
| Aromatic                                              |      |      |      |      |      |      |      |      |      |      |
| >EC <sub>10</sub> - EC <sub>12</sub>                  | 16.0 | 16.8 | 17.0 | 17.0 | 16.0 | 16.9 | 16.3 | 16.4 | 17   | 0.4  |
| >EC <sub>12</sub> - EC <sub>16</sub>                  | 58.9 | 61.0 | 58.8 | 60.0 | 63.9 | 64.5 | 64.9 | 65.0 | 62   | 2.7  |
| >EC <sub>16</sub> - EC <sub>21</sub>                  | 53.0 | 54.5 | 52.9 | 54.1 | 57.0 | 58.1 | 58.3 | 58.3 | 56   | 2.4  |
| >EC <sub>21</sub> - EC <sub>35</sub>                  | 28.2 | 28.5 | 27.8 | 28.1 | 30.1 | 30.7 | 30.4 | 30.7 | 29   | 1.3  |
| >EC <sub>35</sub>                                     | 27.5 | 27.2 | 26.3 | 26.3 | 28.3 | 28.3 | 27.6 | 27.7 | 27   | 0.8  |

Table XIII: Uncertainty of  $\delta$ : Influence of stock solution

|                                      | Influence of stock solution                     |                                             |                               |                                    |                                  |                                      |
|--------------------------------------|-------------------------------------------------|---------------------------------------------|-------------------------------|------------------------------------|----------------------------------|--------------------------------------|
|                                      | $C_{\text{theorist}}$<br>(mg mL <sup>-1</sup> ) | $C_{\text{real}}$<br>(mg mL <sup>-1</sup> ) | Gap<br>(mg mL <sup>-1</sup> ) | $u(C_0)$<br>(mg mL <sup>-1</sup> ) | $u(C_0)_r$<br>x 10 <sup>-3</sup> | $(u(C_0)_r)^2$<br>x 10 <sup>-6</sup> |
| TPH                                  | 1600                                            | 15937.8                                     | 62.2                          | 35.9                               | 2.25                             | 5.06                                 |
| Aliphatic                            |                                                 |                                             |                               |                                    |                                  |                                      |
| >C <sub>10</sub> - C <sub>12</sub>   | 1000                                            | 994.8                                       | 5.2                           | 3.0                                | 3.02                             | 9.12                                 |
| >C <sub>12</sub> - C <sub>16</sub>   | 2000                                            | 1982.4                                      | 17.6                          | 10.2                               | 5.13                             | 26.3                                 |
| >C <sub>16</sub> - C <sub>21</sub>   | 3500                                            | 3487.4                                      | 12.6                          | 7.3                                | 2.09                             | 4.37                                 |
| >C <sub>21</sub> - C <sub>35</sub>   | 7000                                            | 6979.5                                      | 20.5                          | 11.8                               | 1.70                             | 2.89                                 |
| >C <sub>35</sub>                     | 2500                                            | 2493.7                                      | 6.3                           | 3.6                                | 1.46                             | 2.13                                 |
| Aromatic                             |                                                 |                                             |                               |                                    |                                  |                                      |
| >EC <sub>10</sub> - EC <sub>12</sub> | 100                                             | 99.8                                        | 0.2                           | 0.1                                | 1.16                             | 1.35                                 |
| >EC <sub>12</sub> - EC <sub>16</sub> | 200                                             | 197.5                                       | 2.5                           | 1.4                                | 7.31                             | 53.4                                 |
| >EC <sub>16</sub> - EC <sub>21</sub> | 500                                             | 496.5                                       | 3.5                           | 2.0                                | 4.07                             | 16.6                                 |
| >EC <sub>21</sub> - EC <sub>35</sub> | 500                                             | 495                                         | 5                             | 2.9                                | 5.83                             | 34.0                                 |
| >EC <sub>35</sub>                    | 300                                             | 297.5                                       | 2.5                           | 1.4                                | 4.85                             | 23.5                                 |

$$u(C_0)_r = \frac{\text{Gap} / \sqrt{3}}{C_{\text{real}}}$$

Table XIV: Uncertainty of  $\delta$ : Influence of volume (contribution of temperature)

| Influence of temperature |            |                     |         |          |                  |
|--------------------------|------------|---------------------|---------|----------|------------------|
| Volume                   | $\Delta T$ | $\alpha$            | $u(T)$  | $u(T)_r$ | $(u(T)_r)^2$     |
| (mL)                     | (°K)       | (°K <sup>-1</sup> ) | (mL)    |          | $\times 10^{-8}$ |
| 0.1                      | 5          | 0.00135             | 0.0068  | 0.00390  | 15.19            |
| 0.05                     | 5          | 0.00135             | 0.00034 | 0.000198 | 3.796            |

Table XV: Uncertainty of  $\delta$ : Influence of volume (contribution of tolerance of syringe)

| Influence of tolerance of syringe |          |                 |                   |                       |                  |
|-----------------------------------|----------|-----------------|-------------------|-----------------------|------------------|
| Volume                            | Division | $u(\text{Tol})$ | $u(\text{Tol})_r$ | $(u(\text{Tol})_r)^2$ |                  |
| (mL)                              | (mL)     | (mL)            |                   |                       | $\times 10^{-5}$ |
| 0.1                               | 0.001    | 0.00041         | 0.00408           | 1.667                 |                  |
| 0.05                              | 0.0005   | 0.00020         | 0.00408           | 1.667                 |                  |

Table XVI: Uncertainty of  $\delta$ : Influence of volume (contribution of repeatability)

| Influence of repeatability |         |          |                   |                       |                  |
|----------------------------|---------|----------|-------------------|-----------------------|------------------|
| Volume                     | mass    | $s$      | $u(\text{rep})_r$ | $(u(\text{rep})_r)^2$ |                  |
| (mL)                       | (g)     | (g)      |                   |                       | $\times 10^{-5}$ |
| 0.1                        | 0.06593 | 0.000295 | 0.004476          | 2.004                 |                  |
| 0.05                       | 0.03396 | 0.000125 | 0.003717          | 1.381                 |                  |



Table XVII: Repeatability of a weighing of 0.1 mL hexane

|                  | Weight (g) |         |         |         |         |         |         |         | Mean    | s        |
|------------------|------------|---------|---------|---------|---------|---------|---------|---------|---------|----------|
|                  | 1          | 2       | 3       | 4       | 5       | 6       | 7       | 8       |         |          |
| Syringe          | 15.5085    | 15.5085 | 15.5085 | 15.5085 | 15.5085 | 15.5085 | 15.5085 | 15.5085 |         |          |
| Syringe + hexane | 15.5757    | 15.5748 | 15.5747 | 15.5742 | 15.5741 | 15.5742 | 15.5745 | 15.5743 |         |          |
| Hexane           | 0.06613    | 0.06628 | 0.06617 | 0.06563 | 0.06559 | 0.06567 | 0.06622 | 0.06575 | 0.06593 | 0.000295 |

Table XVIII: Repeatability of a weighing of 0.05 mL hexane

|                  | Weight (g) |         |         |         |         |         |         |         | Mean    | s        |
|------------------|------------|---------|---------|---------|---------|---------|---------|---------|---------|----------|
|                  | 1          | 2       | 3       | 4       | 5       | 6       | 7       | 8       |         |          |
| Syringe          | 12.8827    | 12.8827 | 12.8827 | 12.8827 | 12.8827 | 12.8827 | 12.8827 | 12.8827 |         |          |
| Syringe + hexane | 12.9196    | 12.9168 | 12.9165 | 12.9165 | 12.9168 | 12.9166 | 12.9167 | 12.9165 |         |          |
| Hexane           | 0.03402    | 0.03413 | 0.03378 | 0.03385 | 0.03412 | 0.03395 | 0.03399 | 0.03387 | 0.03396 | 0.000125 |

Table XIX: Uncertainty of  $\delta$ : Influence of volume (syringe 0.1 mL and 0.05 mL)

|                                      | V=0.1 mL                         |                                           |                                           |                                  | V=0.05 mL                        |                                           |                                           |                                  |
|--------------------------------------|----------------------------------|-------------------------------------------|-------------------------------------------|----------------------------------|----------------------------------|-------------------------------------------|-------------------------------------------|----------------------------------|
|                                      | $(u(T)_r)^2$<br>$\times 10^{-7}$ | $(u(\text{Tol})_r)^2$<br>$\times 10^{-5}$ | $(u(\text{rep})_r)^2$<br>$\times 10^{-5}$ | $(u(V)_r)^2$<br>$\times 10^{-5}$ | $(u(T)_r)^2$<br>$\times 10^{-8}$ | $(u(\text{Tol})_r)^2$<br>$\times 10^{-5}$ | $(u(\text{rep})_r)^2$<br>$\times 10^{-5}$ | $(u(V)_r)^2$<br>$\times 10^{-5}$ |
| TPH                                  | 1.519                            | 1.667                                     | 2.004                                     | 3.6862                           | 3.796                            | 1.667                                     | 1.381                                     | 3.0518                           |
| Aliphatic                            |                                  |                                           |                                           |                                  |                                  |                                           |                                           |                                  |
| >C <sub>10</sub> - C <sub>12</sub>   | 1.519                            | 1.667                                     | 2.004                                     | 3.6862                           | 3.796                            | 1.667                                     | 1.381                                     | 3.0518                           |
| >C <sub>12</sub> - C <sub>16</sub>   | 1.519                            | 1.667                                     | 2.004                                     | 3.6862                           | 3.796                            | 1.667                                     | 1.381                                     | 3.0518                           |
| >C <sub>16</sub> - C <sub>21</sub>   | 1.519                            | 1.667                                     | 2.004                                     | 3.6862                           | 3.796                            | 1.667                                     | 1.381                                     | 3.0518                           |
| >C <sub>21</sub> - C <sub>35</sub>   | 1.519                            | 1.667                                     | 2.004                                     | 3.6862                           | 3.796                            | 1.667                                     | 1.381                                     | 3.0518                           |
| >C <sub>35</sub>                     | 1.519                            | 1.667                                     | 2.004                                     | 3.6862                           | 3.796                            | 1.667                                     | 1.381                                     | 3.0518                           |
| Aromatic                             |                                  |                                           |                                           |                                  |                                  |                                           |                                           |                                  |
| >EC <sub>10</sub> - EC <sub>12</sub> | 1.159                            | 1.667                                     | 2.004                                     | 3.6862                           | 3.796                            | 1.667                                     | 1.381                                     | 3.0518                           |
| >EC <sub>12</sub> - EC <sub>16</sub> | 1.159                            | 1.667                                     | 2.004                                     | 3.6862                           | 3.796                            | 1.667                                     | 1.381                                     | 3.0518                           |
| >EC <sub>16</sub> - EC <sub>21</sub> | 1.159                            | 1.667                                     | 2.004                                     | 3.6862                           | 3.796                            | 1.667                                     | 1.381                                     | 3.0518                           |
| >EC <sub>21</sub> - EC <sub>35</sub> | 1.159                            | 1.667                                     | 2.004                                     | 3.6862                           | 3.796                            | 1.667                                     | 1.381                                     | 3.0518                           |
| >EC <sub>35</sub>                    | 1.159                            | 1.667                                     | 2.004                                     | 3.6862                           | 3.796                            | 1.667                                     | 1.381                                     | 3.0518                           |

Table XX: Uncertainty of  $\delta$ : Components of uncertainty for each calibrate solution.

| Calibrate solution | $u(C_0)_r$   | $u(V_i)_r$     | $u(V_0)_r$     |
|--------------------|--------------|----------------|----------------|
| 1                  | $u(C_{std})$ | $u(V_{100})_r$ | -              |
| 2                  | $u(C_{std})$ | $u(V_{100})_r$ | $u(V_{100})_r$ |
| 3                  | $u(C_{std})$ | $u(V_{100})_r$ | $u(V_{100})_r$ |
| 4                  | $u(C_{std})$ | $u(V_{100})_r$ | $u(V_{50})_r$  |
| 5                  | $u(C_{std})$ | $u(V_{100})_r$ | $u(V_{50})_r$  |
| 6                  | $u(C_{std})$ | $u(V_{100})_r$ | $u(V_{50})_r$  |

Table XXI: Uncertainty of  $\delta$ : Influence of standards of calibrate

|                                      | $u(C_1)_r$       | $u(C_2)_r$       | $u(C_3)_r$       | $u(C_4)_r$       | $u(C_5)_r$       | $u(C_6)_r$       | $u(C_{std})_r$   |
|--------------------------------------|------------------|------------------|------------------|------------------|------------------|------------------|------------------|
|                                      | $\times 10^{-3}$ | $\times 10^{-2}$ |
| TPH                                  | 6.476            | 8.877            | 8.877            | 8.512            | 8.512            | 8.512            | 2.042            |
| Aliphatic                            |                  |                  |                  |                  |                  |                  |                  |
| >C <sub>10</sub> - C <sub>12</sub>   | 6.780            | 9.101            | 9.101            | 8.746            | 8.746            | 8.746            | 2.100            |
| >C <sub>12</sub> - C <sub>16</sub>   | 7.946            | 10.00            | 10.00            | 9.678            | 9.678            | 9.678            | 2.333            |
| >C <sub>16</sub> - C <sub>21</sub>   | 6.420            | 8.836            | 8.836            | 8.470            | 8.470            | 8.470            | 2.031            |
| >C <sub>21</sub> - C <sub>35</sub>   | 6.304            | 8.752            | 8.752            | 8.382            | 8.382            | 8.382            | 2.009            |
| >C <sub>35</sub>                     | 6.244            | 8.709            | 8.709            | 8.337            | 8.337            | 8.337            | 1.998            |
| Aromatic                             |                  |                  |                  |                  |                  |                  |                  |
| >EC <sub>10</sub> - EC <sub>12</sub> | 6.180            | 8.864            | 8.864            | 8.290            | 8.290            | 8.290            | 1.986            |
| >EC <sub>12</sub> - EC <sub>16</sub> | 9.501            | 11.27            | 11.27            | 10.99            | 10.99            | 10.99            | 2.659            |
| >EC <sub>16</sub> - EC <sub>21</sub> | 7.309            | 9.502            | 9.502            | 9.162            | 9.162            | 9.162            | 2.204            |
| >EC <sub>21</sub> - EC <sub>35</sub> | 8.418            | 10.38            | 10.38            | 10.07            | 10.07            | 10.07            | 2.430            |
| >EC <sub>35</sub>                    | 7.772            | 9.862            | 9.862            | 9.535            | 9.535            | 9.535            | 2.297            |

$$u(C_{std})_r = \sqrt{\sum_{i=1}^{n=6} \left( \frac{u(C_i)}{C_i} \right)^2}$$

Table XXII: Uncertainty of  $\delta$ .

|                                      | $u(A)_r$         | $u(C_{std})_r$   | $u(\delta)_r$    |
|--------------------------------------|------------------|------------------|------------------|
|                                      | $\times 10^{-2}$ | $\times 10^{-2}$ | $\times 10^{-2}$ |
| TPH                                  | 1.773            | 2.042            | 2.705            |
| Aliphatic                            |                  |                  |                  |
| >C <sub>10</sub> - C <sub>12</sub>   | 1.250            | 2.100            | 2.444            |
| >C <sub>12</sub> - C <sub>16</sub>   | 1.354            | 2.333            | 2.695            |
| >C <sub>16</sub> - C <sub>21</sub>   | 0.825            | 2.031            | 2.191            |
| >C <sub>21</sub> - C <sub>35</sub>   | 1.340            | 2.009            | 2.416            |
| >C <sub>35</sub>                     | 2.616            | 1.998            | 2.878            |
| Aromatic                             |                  |                  |                  |
| >EC <sub>10</sub> - EC <sub>12</sub> | 2.540            | 1.986            | 3.227            |
| >EC <sub>12</sub> - EC <sub>16</sub> | 4.428            | 2.659            | 5.166            |
| >EC <sub>16</sub> - EC <sub>21</sub> | 4.279            | 2.204            | 4.811            |
| >EC <sub>21</sub> - EC <sub>35</sub> | 4.455            | 2.430            | 5.074            |
| >EC <sub>35</sub>                    | 2.803            | 2.297            | 3.626            |

$$u(\delta)_r = \sqrt{\left(\frac{u(A)}{A}\right)^2 + \left(\frac{u(C_{std})}{C_{std}}\right)^2}$$

Table XXIII: Uncertainty of recovery.

|                                      | Recovery (%) |     |     |     |     |     |     |     | Mean | s  | u(R) <sub>r</sub> |
|--------------------------------------|--------------|-----|-----|-----|-----|-----|-----|-----|------|----|-------------------|
|                                      | 1            | 2   | 3   | 4   | 5   | 6   | 7   | 8   |      |    |                   |
| TPH                                  | 120          |     | 91  | 91  | 87  | 138 | 103 | 78  | 101  | 21 | 0.0738            |
| Aliphatic                            |              |     |     |     |     |     |     |     |      |    |                   |
| >C <sub>10</sub> - C <sub>12</sub>   | 96           | 113 | 106 | 97  | 109 | 105 | 88  | 106 | 102  | 8  | 0.0279            |
| >C <sub>12</sub> - C <sub>16</sub>   | 106          | 92  | 87  | 77  | 89  | 88  | 95  | 102 | 92   | 9  | 0.0348            |
| >C <sub>16</sub> - C <sub>21</sub>   | 102          | 89  | 94  | 87  | 90  | 88  | 91  | 93  | 92   | 5  | 0.0179            |
| >C <sub>21</sub> - C <sub>35</sub>   | 124          | 113 | 127 | 125 | 120 | 114 | 122 | 124 | 121  | 5  | 0.0148            |
| >C <sub>35</sub>                     |              |     |     |     |     |     |     |     |      |    |                   |
| Aromatic                             |              |     |     |     |     |     |     |     |      |    |                   |
| >EC <sub>10</sub> - EC <sub>12</sub> | 148          | 151 | 116 | 174 | 179 | 109 | 154 | 223 | 157  | 36 | 0.0817            |
| >EC <sub>12</sub> - EC <sub>16</sub> | 109          | 97  | 155 | 69  | 98  | 102 | 87  | 90  | 101  | 25 | 0.0872            |
| >EC <sub>16</sub> - EC <sub>21</sub> | 108          | 100 | 122 | 80  | 98  | 103 | 92  | 96  | 100  | 12 | 0.0431            |
| >EC <sub>21</sub> - EC <sub>35</sub> | 123          | 66  | 106 | 53  | 99  | 127 | 121 | 126 | 103  | 29 | 0.0989            |
| >EC <sub>35</sub>                    |              |     |     |     |     |     |     |     |      |    |                   |

$$u(R)_r = \left( \frac{s/\sqrt{n}}{R} \right)$$

Table XXIV: Uncertainty of inhomogeneity.

|            | mass of hydrocarbons (mg kg <sup>-1</sup> ) |     |     |       |       |                   |
|------------|---------------------------------------------|-----|-----|-------|-------|-------------------|
|            | 1                                           | 2   | 3   | Mean  | s     | u(I) <sub>r</sub> |
| TPH        | 824                                         | 856 | 801 | 827.0 | 27.62 | 0.019             |
| Aliphatic  |                                             |     |     |       |       |                   |
| >C10-C12   | 6                                           | 6   | 5   | 5.7   | 0.58  | 0.059             |
| >C12-C16   | 27                                          | 29  | 31  | 29.0  | 2.00  | 0.040             |
| >C16-C21   | 112                                         | 124 | 115 | 117.0 | 6.24  | 0.031             |
| >C21-C35   | 316                                         | 301 | 309 | 308.7 | 7.51  | 0.014             |
| >C35       | 110                                         | 100 | 107 | 105.7 | 5.13  | 0.028             |
| Aromatic   |                                             |     |     |       |       |                   |
| >EC10-EC12 | 23                                          | 21  | 24  | 22.7  | 1.53  | 0.039             |
| >EC12-EC16 | 24                                          | 24  | 22  | 23.3  | 1.15  | 0.029             |
| >EC16-EC21 | 46                                          | 51  | 41  | 46.0  | 5.00  | 0.063             |
| >EC21-EC35 | 106                                         | 127 | 121 | 118.0 | 10.82 | 0.053             |
| >EC35      | 28                                          | 25  | 20  | 24.3  | 4.04  | 0.096             |

$$u_r(I) = \left( \frac{s/\sqrt{n}}{C_s} \right)$$

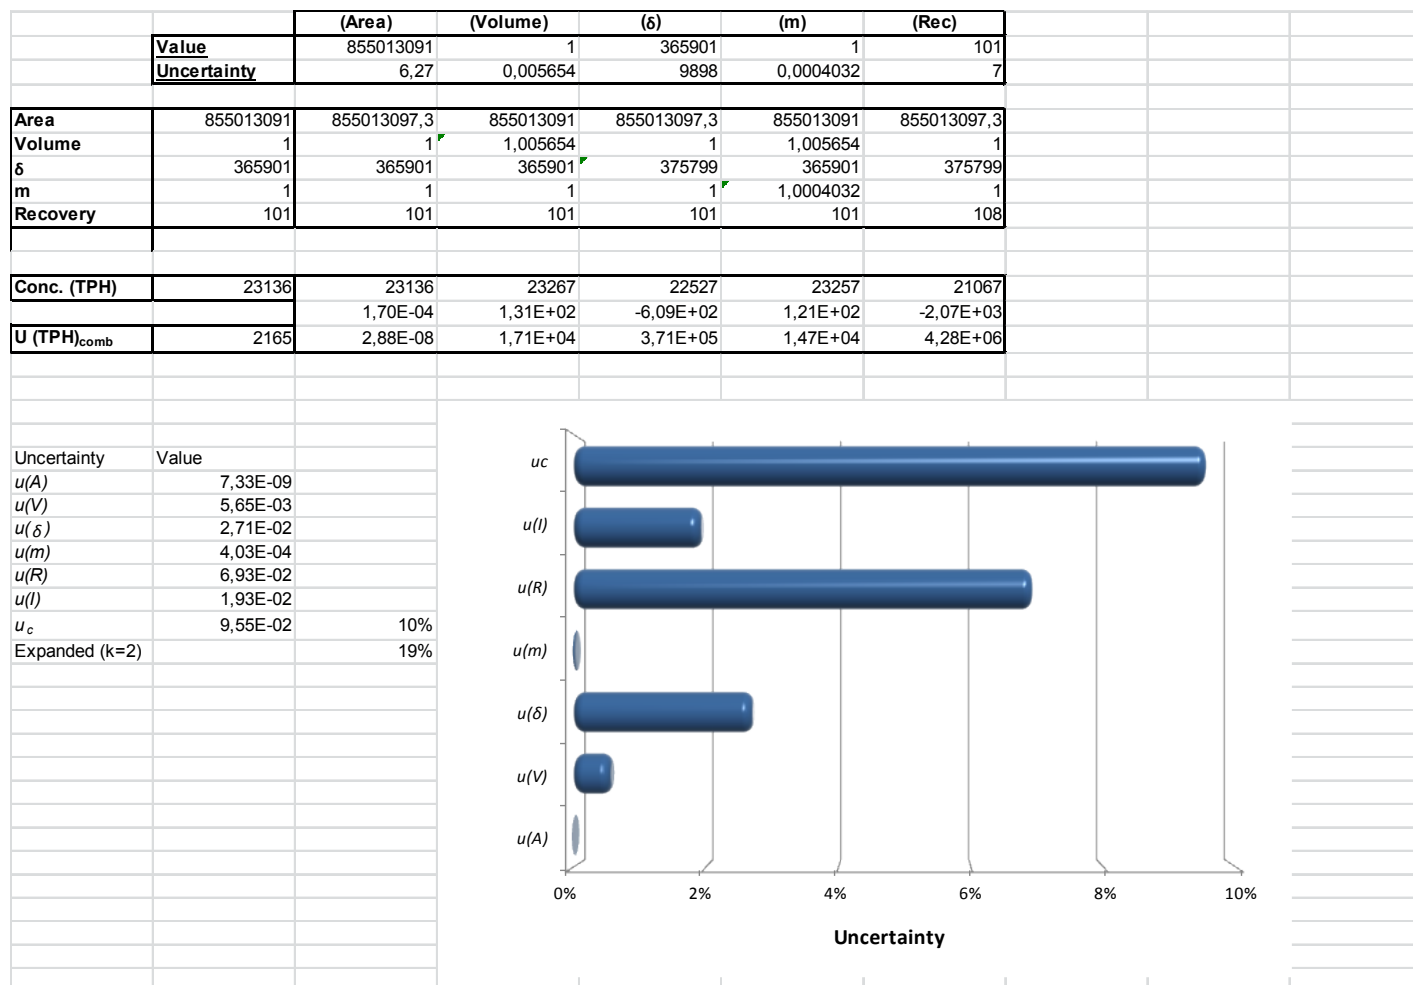

Figure III: Uncertainty combined of TPH.



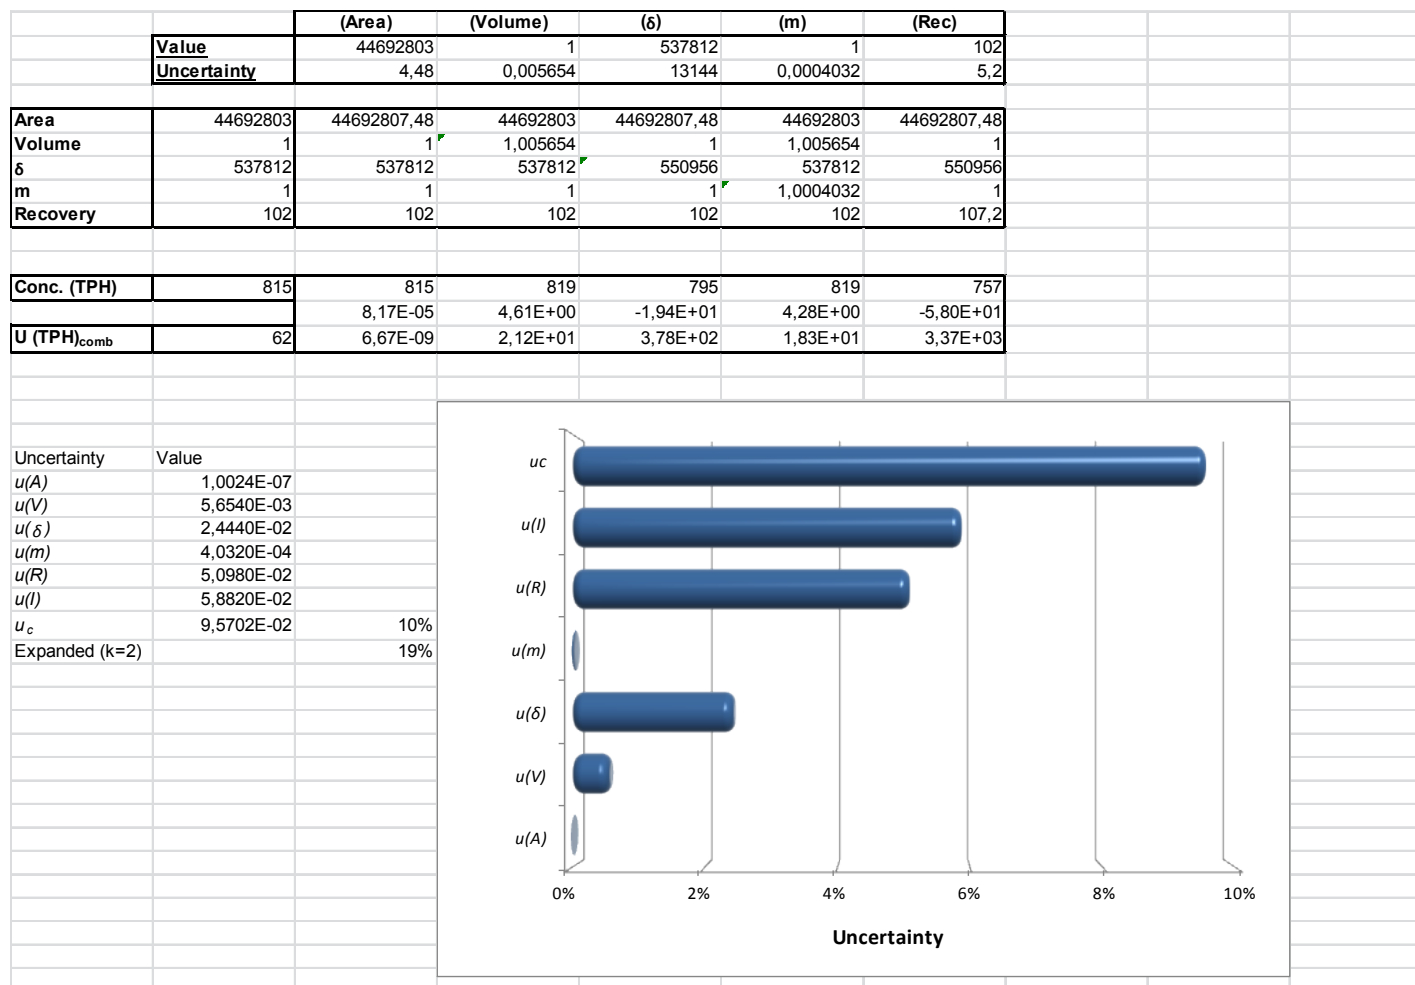Figure IV: Uncertainty combined of >C<sub>10</sub> – C<sub>12</sub> (Aliphatic).

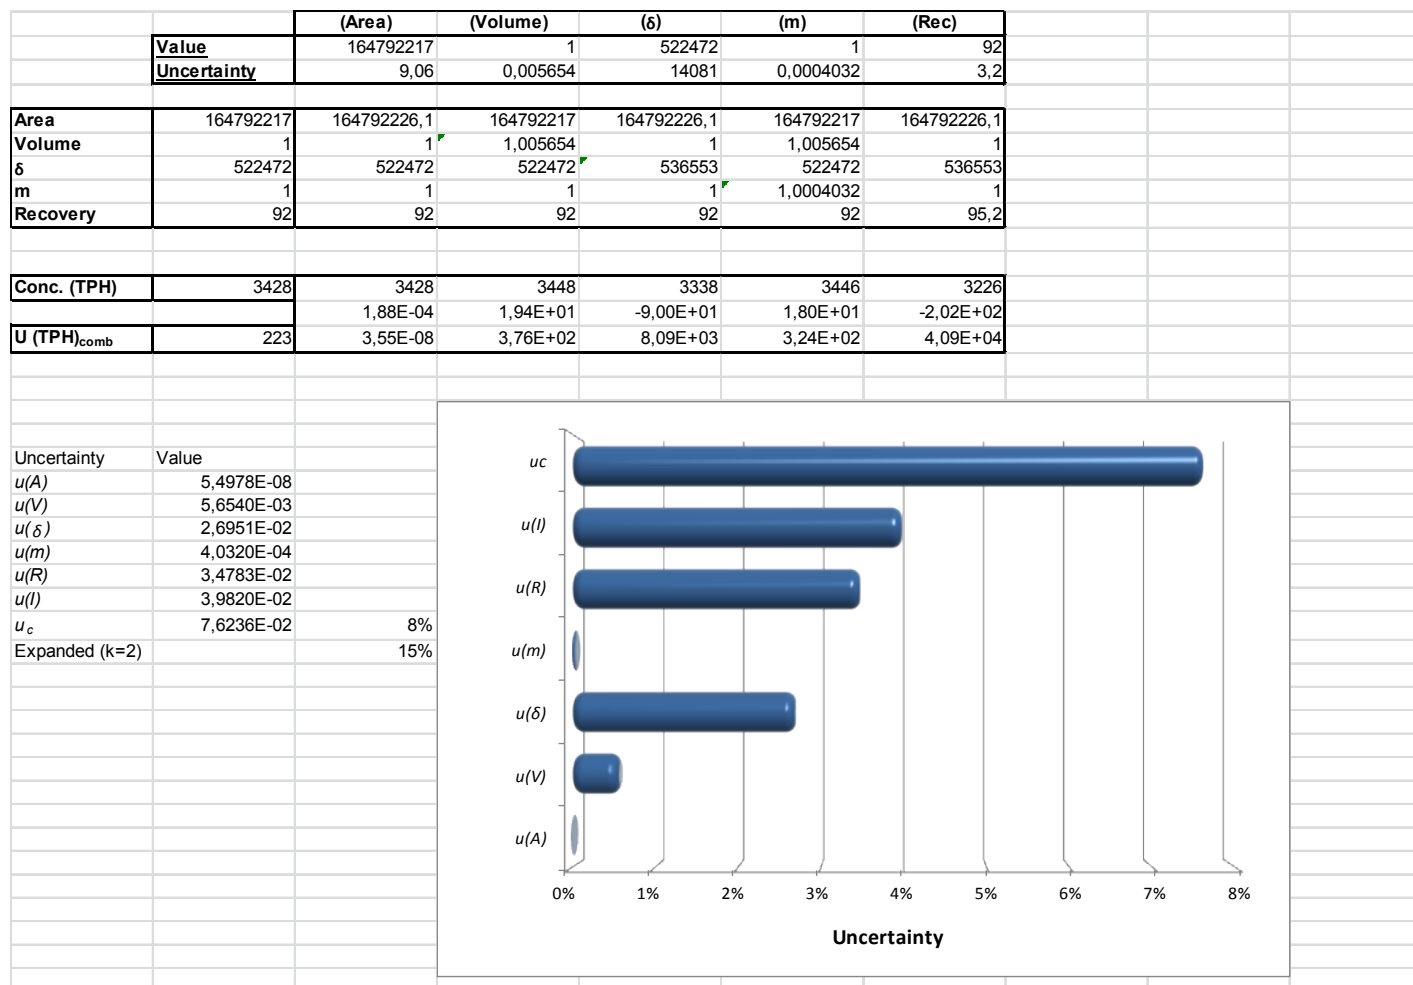Figure V: Uncertainty combined of  $>C_{12} - C_{16}$  (Aliphatic).

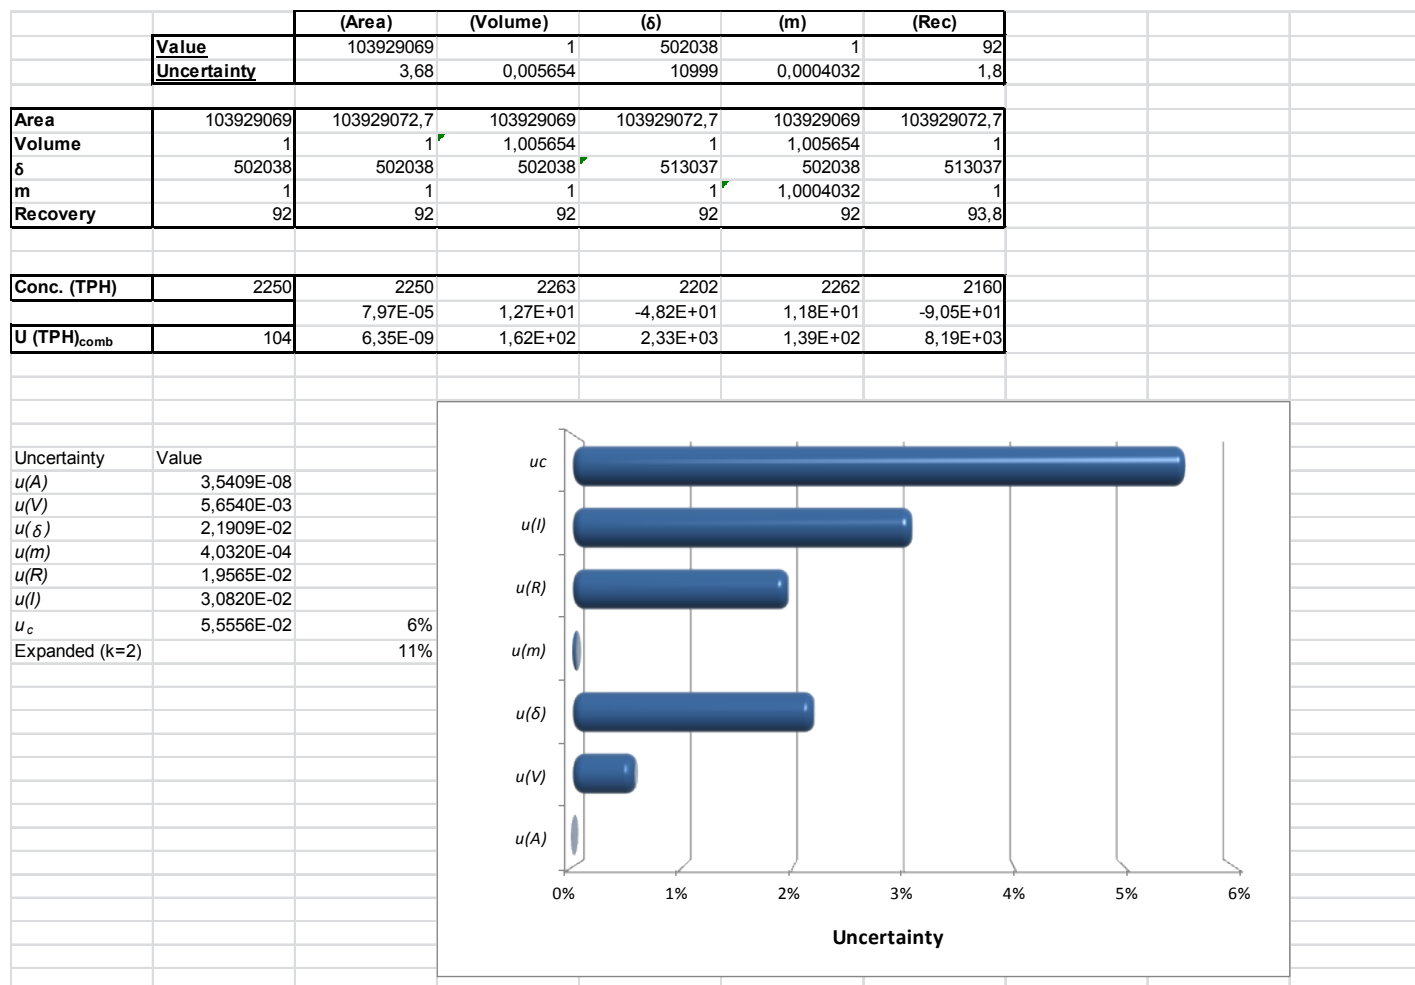Figure VI: Uncertainty combined of  $>C_{16} - C_{21}$  (Aliphatic).

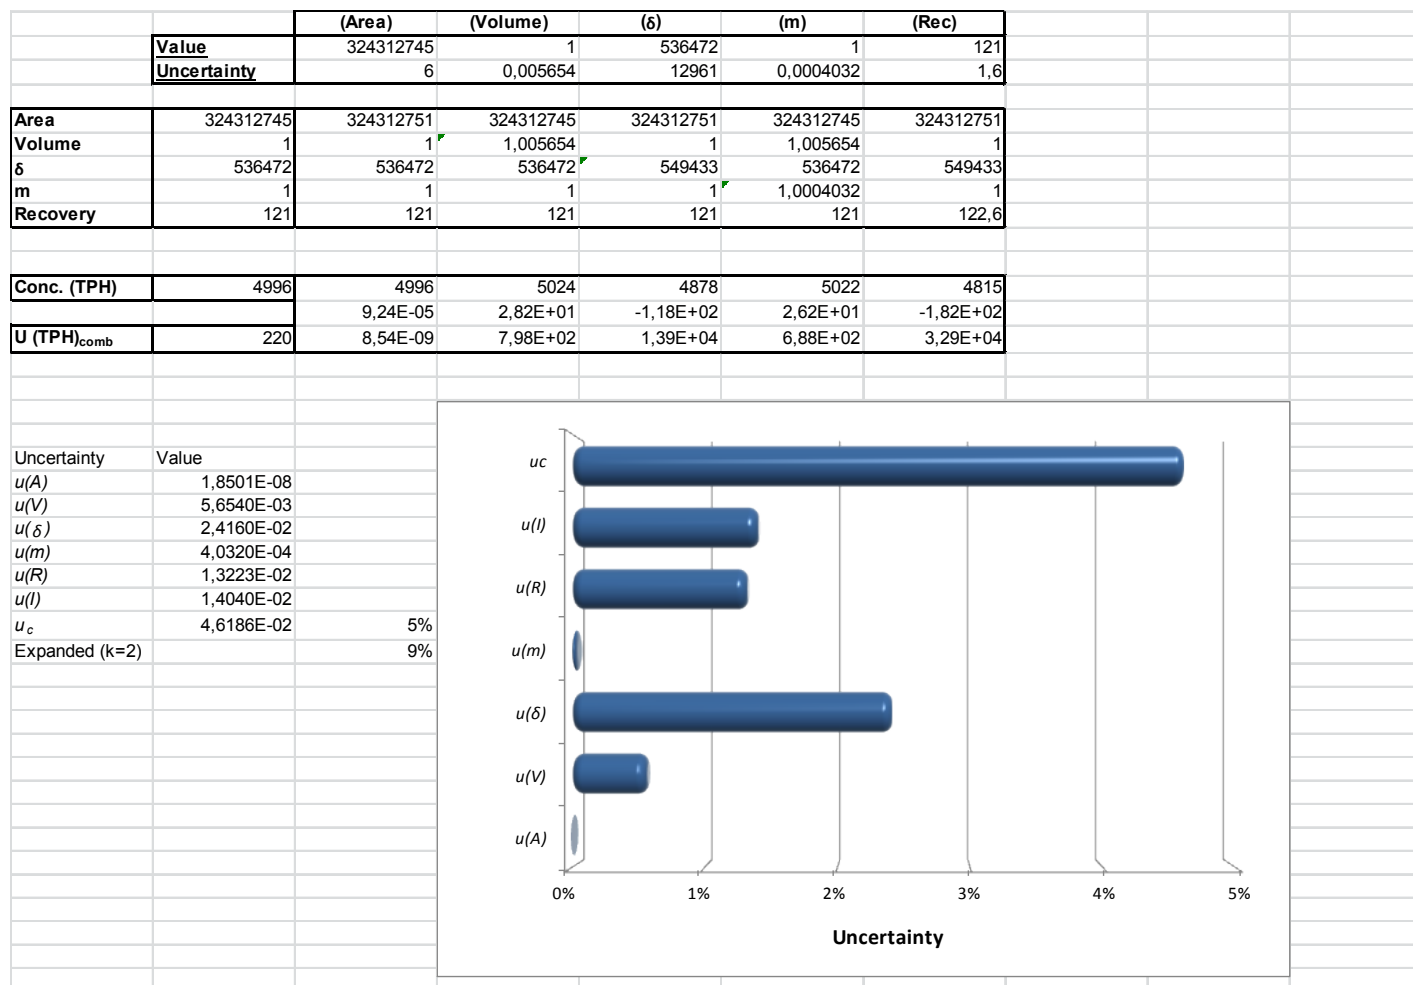Figure VII: Uncertainty combined of >C<sub>21</sub> – C<sub>35</sub> (Aliphatic).

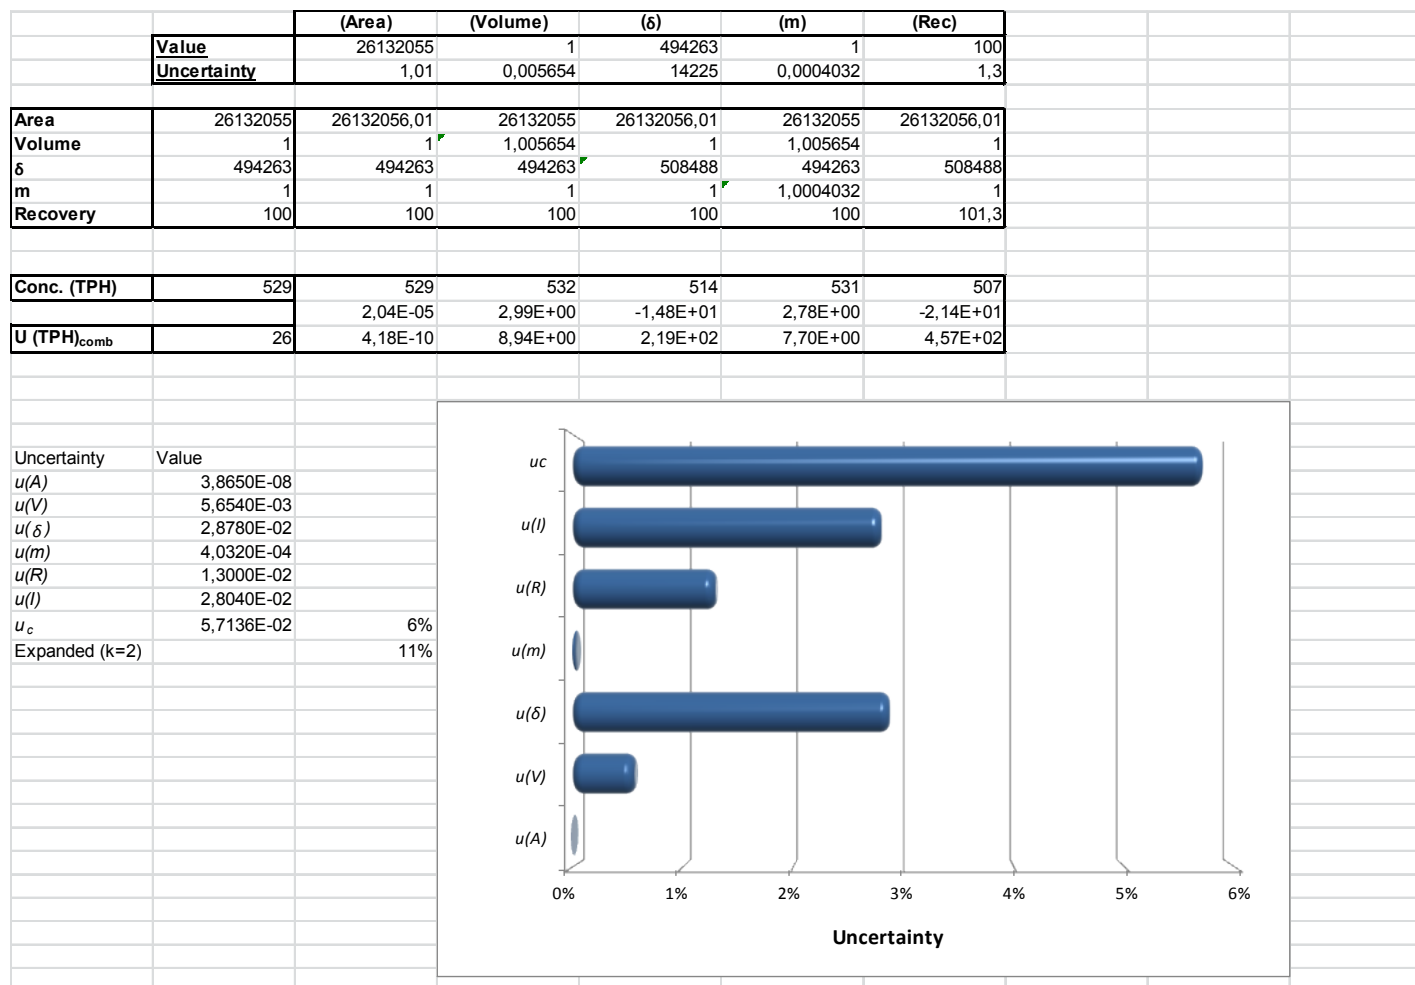Figure VIII: Uncertainty combined of >C<sub>35</sub> (Aliphatic).

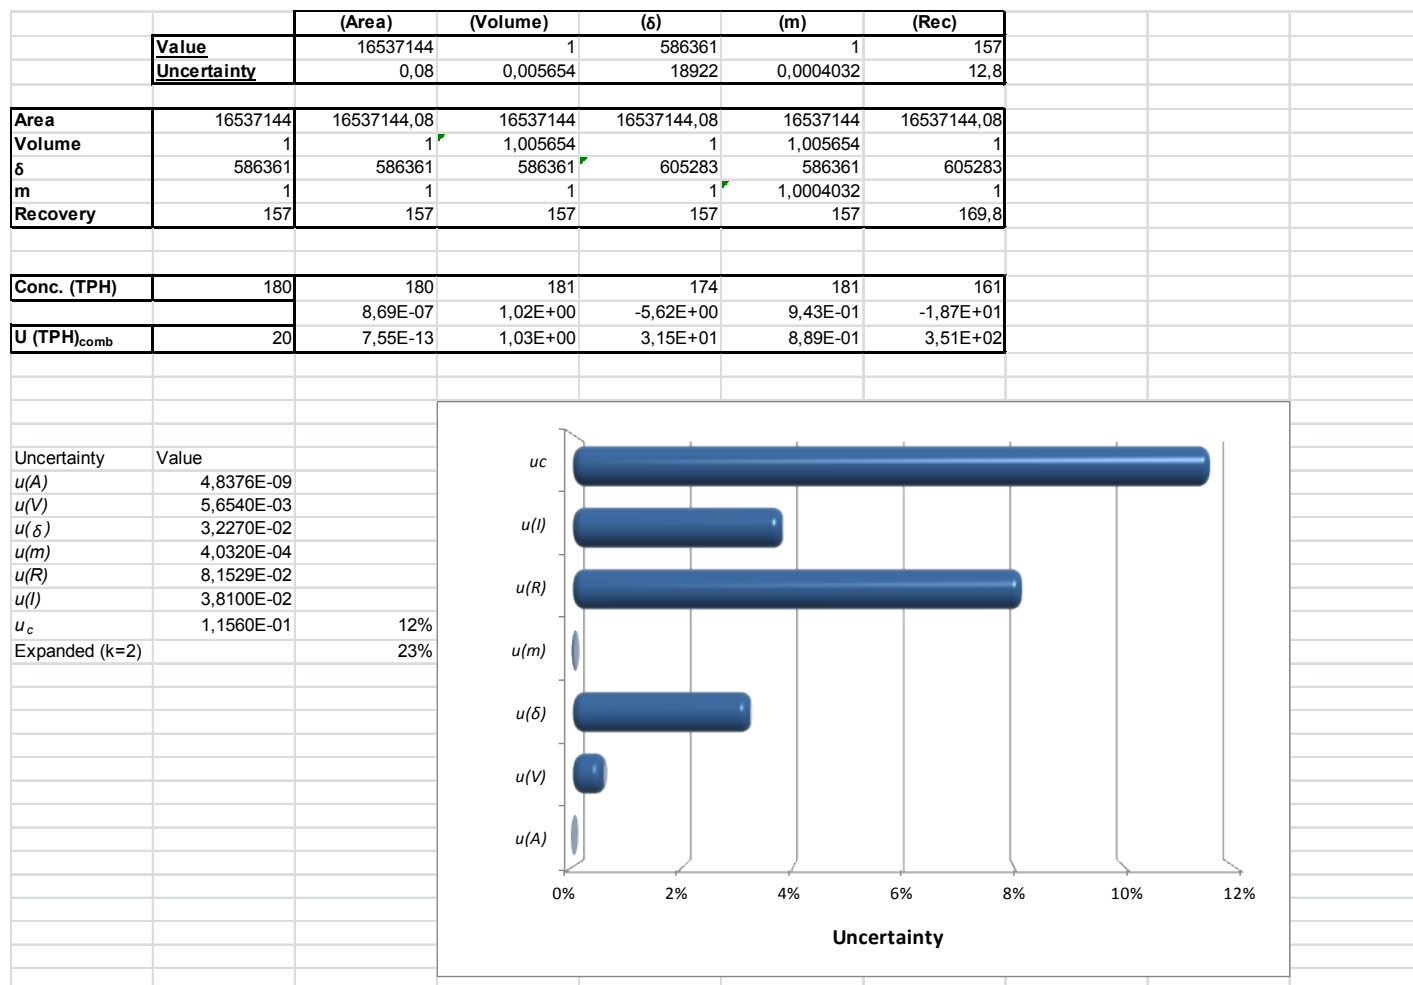Figure IX: Uncertainty combined of  $>C_{10} - C_{12}$  (Aromatic).

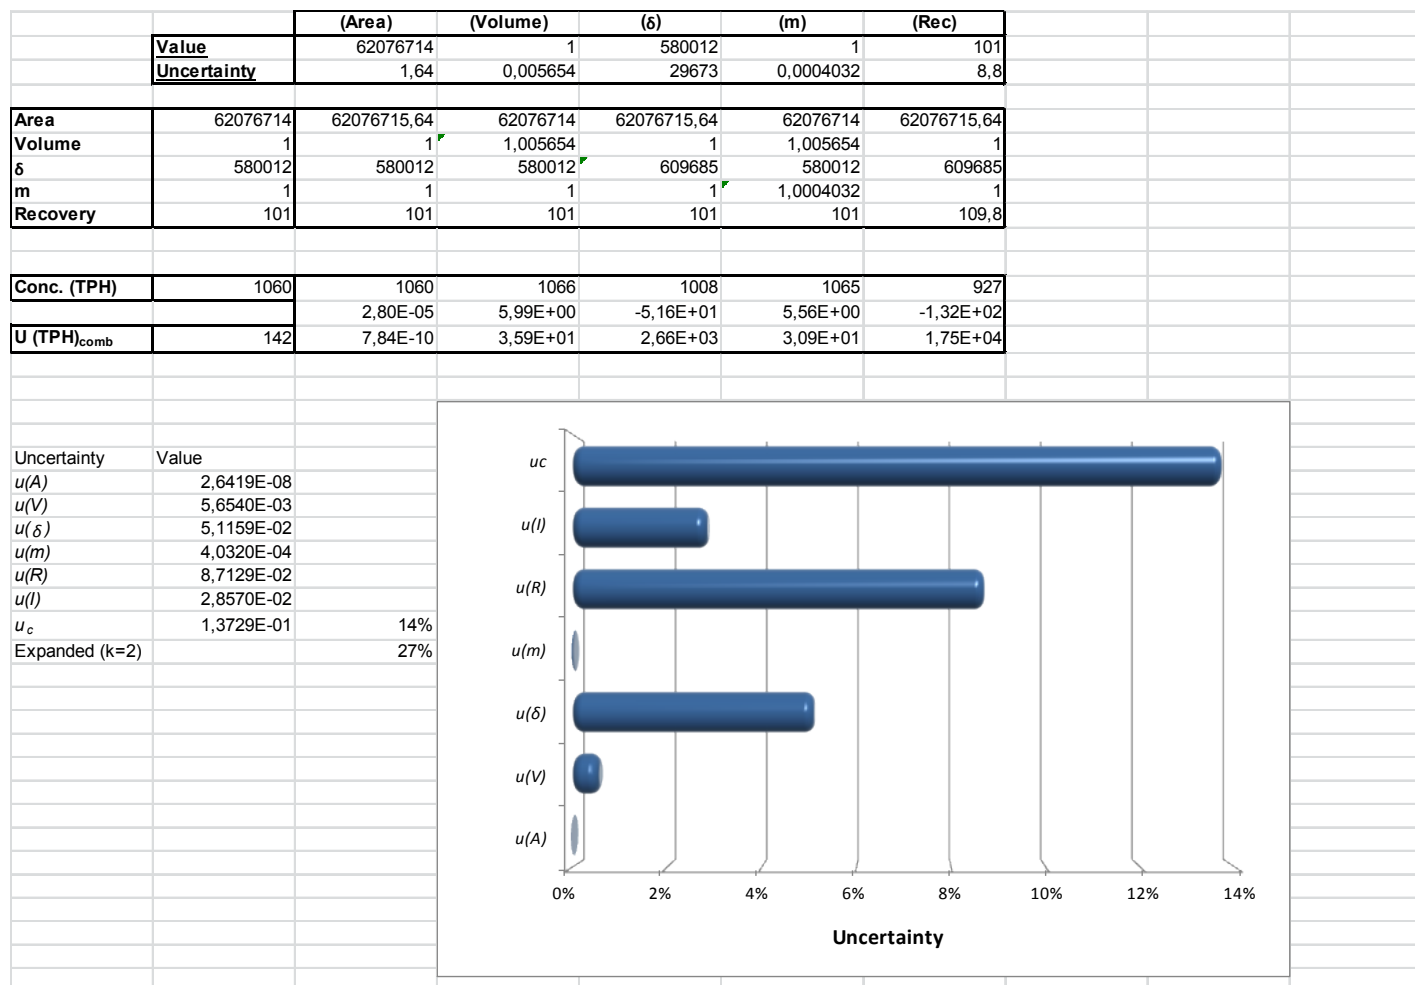Figure X: Uncertainty combined of >C<sub>12</sub> – C<sub>16</sub> (Aromatic).

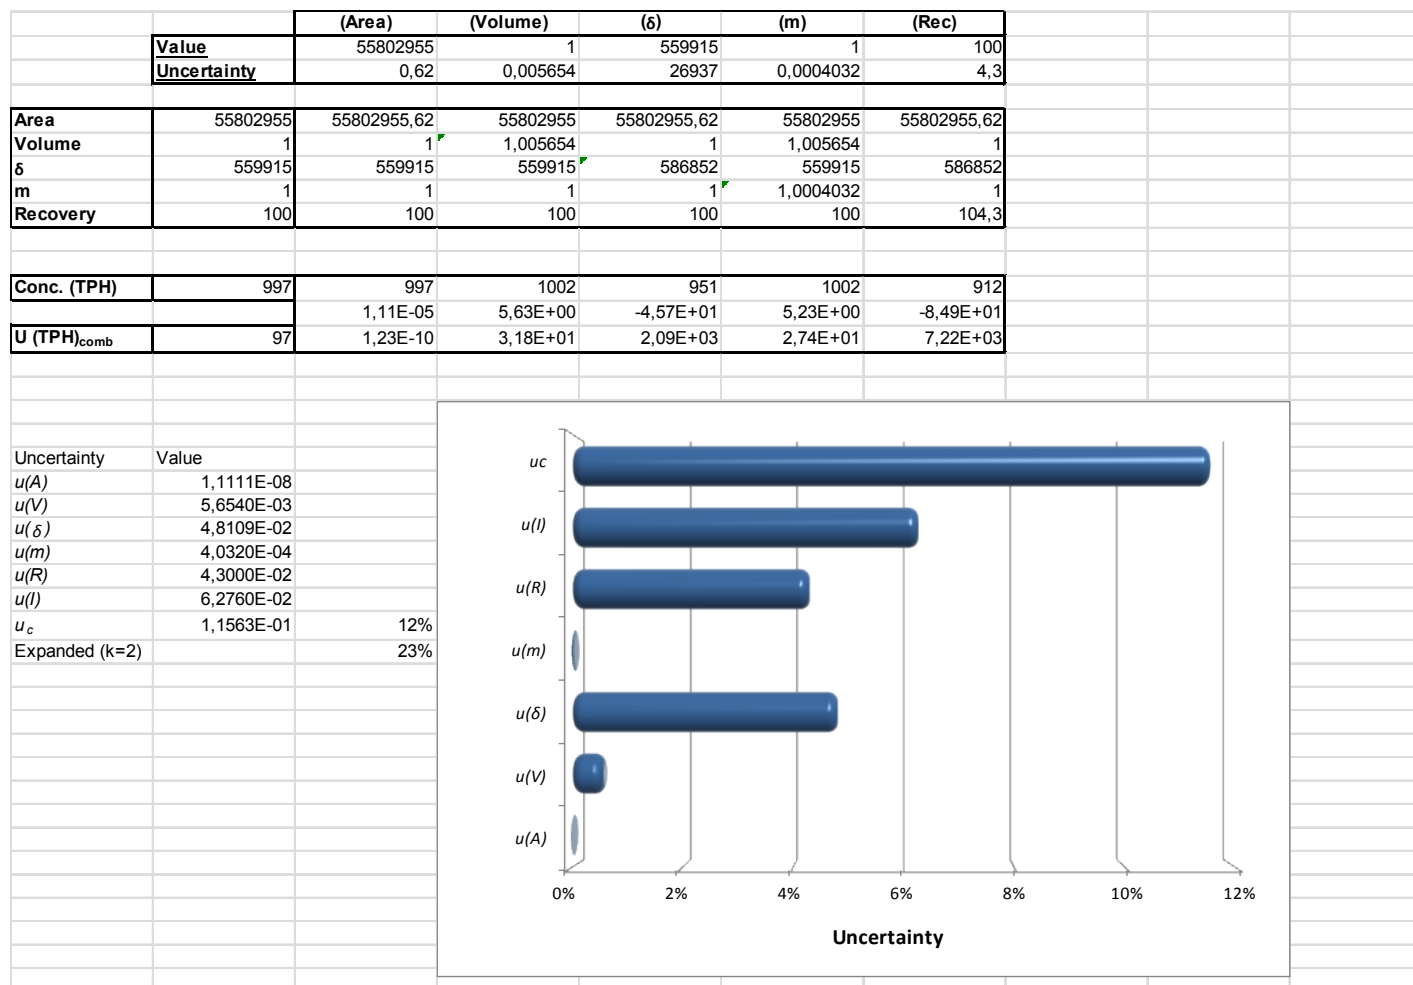Figure XI: Uncertainty combined of >C<sub>16</sub> – C<sub>21</sub> (Aromatic).



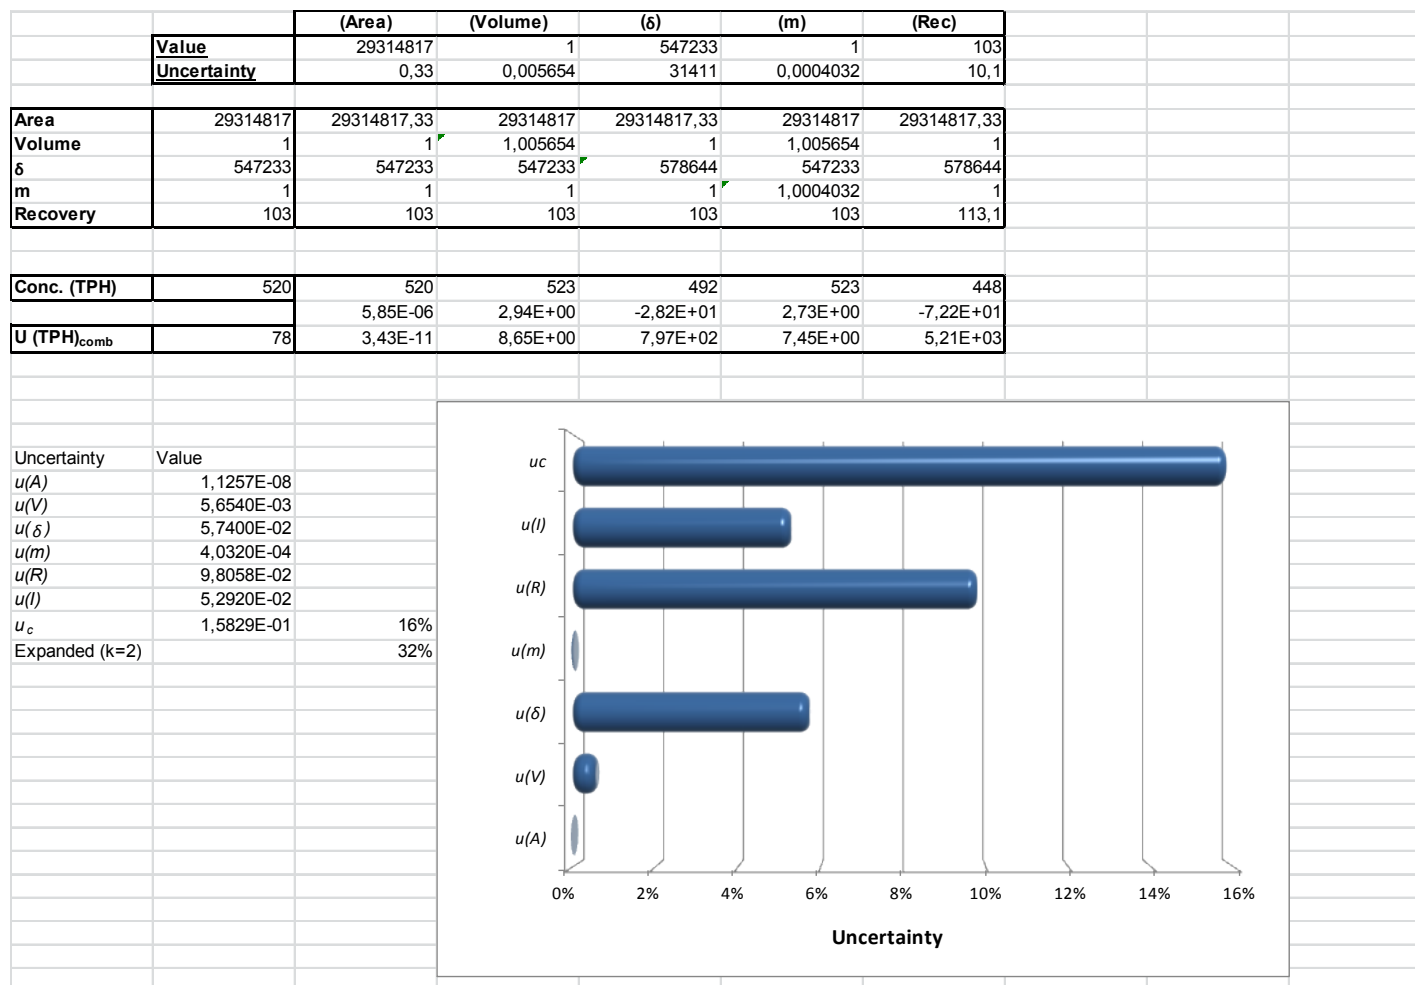Figure XII: Uncertainty combined of >C<sub>21</sub> – C<sub>35</sub> (Aromatic).

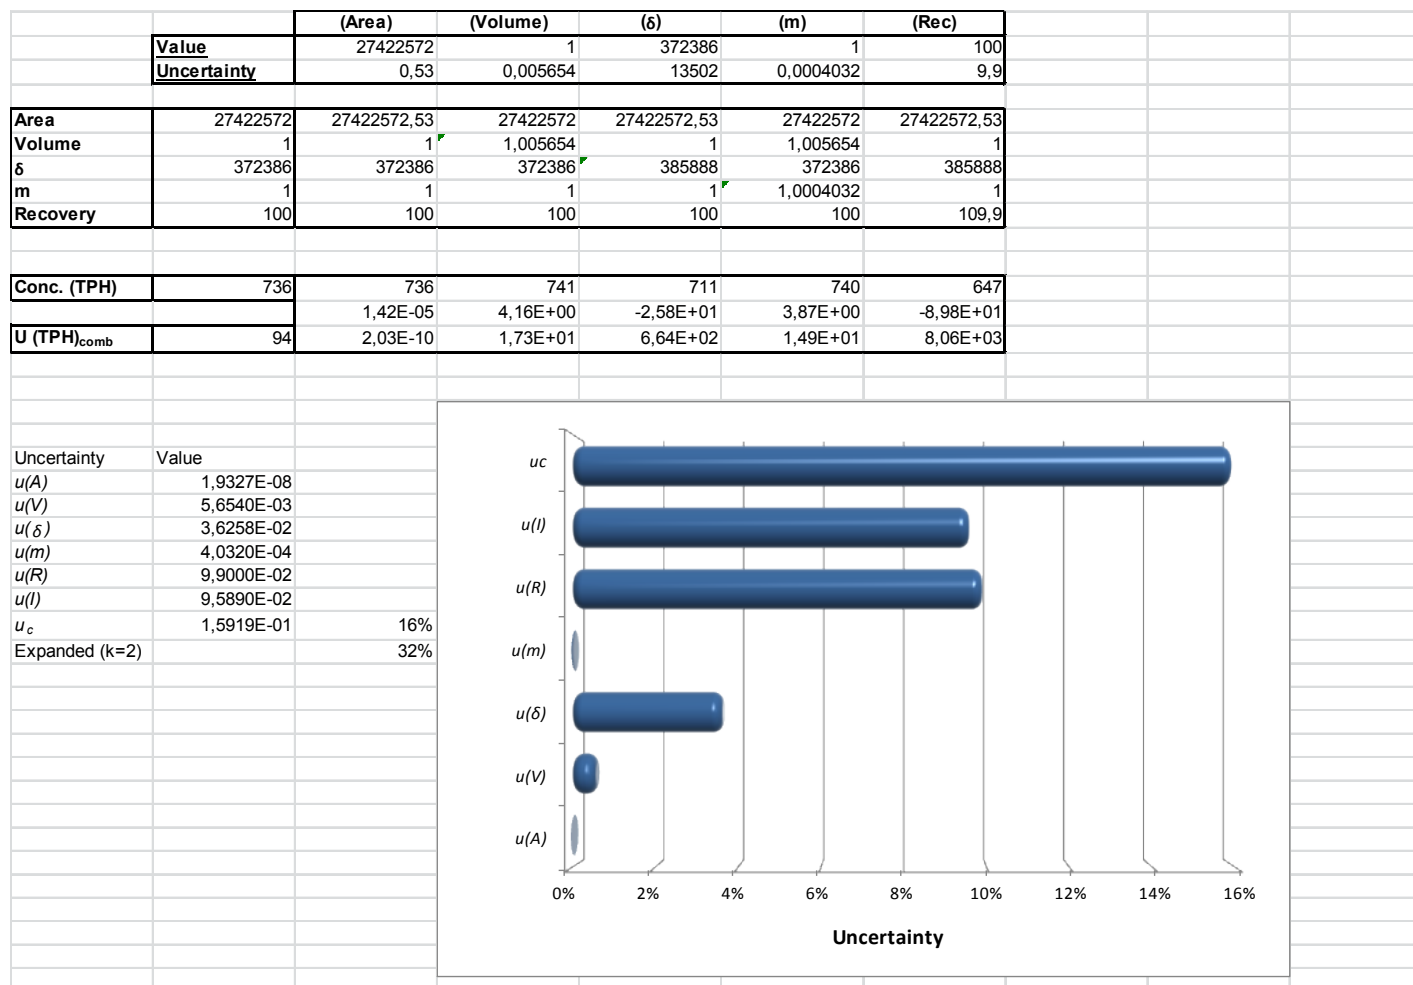Figure XIII: Uncertainty combined of  $>C_{35}$  (Aromatic).
